# Supplementary material for: Association between the Use of Statins and Brain Tumors
Source: MDPI journal article supplement (doi:10.3390/biomedicines11082247), 2023-08-10
Supplement: s1 [file s1]

**S8 table** Crude and overlap propensity score weighted odd ratios of dates of Lipophilic statin prescription for benign brain tumor

| Characteristics                        | N of                                      | N of                           | Odd ratios for benign brain tumor (95% confidence interval) |         |                          |         |
|----------------------------------------|-------------------------------------------|--------------------------------|-------------------------------------------------------------|---------|--------------------------|---------|
|                                        | Benign brain tumor<br>(exposure/total, %) | Control<br>(exposure/total, %) | Crude                                                       | P-value | Overlap weighted model † | P-value |
| Age < 55 years old (n= 1,980)          |                                           |                                |                                                             |         |                          |         |
| Normal                                 | 275/396 (69.44)                           | 1,136/1,584 (71.72)            | 1                                                           |         | 1                        |         |
| Dyslipidemia without Lipophilic statin | 94/396 (23.74)                            | 371/1,584 (23.42)              | 1.05 (0.81-1.36)                                            | 0.733   | 0.97 (0.78-1.21)         | 0.805   |
| Dyslipidemia with < 365 days           | 17/396 (4.29)                             | 52/1,584 (3.28)                | 1.35 (0.77-2.37)                                            | 0.296   | 1.36 (0.83-2.23)         | 0.22    |
| Dyslipidemia with ≥ 365 days           | 10/396 (2.53)                             | 25/1,584 (1.58)                | 1.65 (0.79-3.48)                                            | 0.186   | 1.49 (0.79-2.81)         | 0.221   |
| Age ≥ 55 years old (n= 2,125)          |                                           |                                |                                                             |         |                          |         |
| Normal                                 | 160/425 (37.65)                           | 725/1,700 (42.65)              | 1                                                           |         | 1                        |         |
| Dyslipidemia without Lipophilic statin | 135/425 (31.76)                           | 610/1,700 (35.88)              | 1.00 (0.78-1.29)                                            | 0.983   | 1.03 (0.84-1.27)         | 0.751   |
| Dyslipidemia with < 365 days           | 63/425 (14.82)                            | 156/1,700 (9.18)               | 1.83 (1.30-2.57)                                            | <0.001* | 1.69 (1.27-2.26)         | <0.001* |
| Dyslipidemia with ≥ 365 days           | 67/425 (15.76)                            | 209/1,700 (12.29)              | 1.45 (1.05-2.01)                                            | 0.024*  | 1.44 (1.09-1.90)         | 0.009*  |
| Male (n= 1,530)                        |                                           |                                |                                                             |         |                          |         |
| Normal                                 | 174/306 (56.86)                           | 769/1,224 (62.83)              | 1                                                           |         | 1                        |         |
| Dyslipidemia without Lipophilic statin | 81/306 (26.47)                            | 329/1,224 (26.88)              | 1.09 (0.81-1.46)                                            | 0.573   | 1.21 (0.94-1.55)         | 0.139   |
| Dyslipidemia with < 365 days           | 26/306 (8.5)                              | 64/1,224 (5.23)                | 1.80 (1.11-2.91)                                            | 0.018*  | 2.05 (1.32-3.17)         | 0.001*  |
| Dyslipidemia with ≥ 365 days           | 25/306 (8.17)                             | 62/1,224 (5.07)                | 1.78 (1.09-2.92)                                            | 0.022*  | 2.08 (1.33-3.25)         | 0.001*  |

Female (n= 2,575)

|                                        |                 |                     |                  |        |                  |       |
|----------------------------------------|-----------------|---------------------|------------------|--------|------------------|-------|
| Normal                                 | 261/515 (50.68) | 1,092/2,060 (53.01) | 1                |        | 1                |       |
| Dyslipidemia without Lipophilic statin | 148/515 (28.74) | 652/2,060 (31.65)   | 0.95 (0.76-1.19) | 0.651  | 0.94 (0.78-1.13) | 0.504 |
| Dyslipidemia with < 365 days           | 54/515 (10.49)  | 144/2,060 (6.99)    | 1.57 (1.12-2.21) | 0.009* | 1.42 (1.06-1.91) | 0.02* |
| Dyslipidemia with ≥ 365 days           | 52/515 (10.1)   | 172/2,060 (8.35)    | 1.26 (0.90-1.77) | 0.173  | 1.21 (0.90-1.64) | 0.21  |

Low income groups (n= 1,740)

|                                        |                 |                   |                  |       |                  |       |
|----------------------------------------|-----------------|-------------------|------------------|-------|------------------|-------|
| Normal                                 | 201/348 (57.76) | 842/1,392 (60.49) | 1                |       | 1                |       |
| Dyslipidemia without Lipophilic statin | 91/348 (26.15)  | 383/1,392 (27.51) | 1.00 (0.76-1.31) | 0.973 | 0.98 (0.78-1.24) | 0.868 |
| Dyslipidemia with < 365 days           | 26/348 (7.47)   | 82/1,392 (5.89)   | 1.33 (0.83-2.12) | 0.234 | 1.33 (0.89-1.99) | 0.163 |
| Dyslipidemia with ≥ 365 days           | 30/348 (8.62)   | 85/1,392 (6.11)   | 1.48 (0.95-2.30) | 0.084 | 1.39 (0.94-2.07) | 0.101 |

High income groups (n= 2,365)

|                                        |                 |                     |                  |         |                  |         |
|----------------------------------------|-----------------|---------------------|------------------|---------|------------------|---------|
| Normal                                 | 234/473 (49.47) | 1,019/1,892 (53.86) | 1                |         | 1                |         |
| Dyslipidemia without Lipophilic statin | 138/473 (29.18) | 598/1,892 (31.61)   | 1.00 (0.80-1.27) | 0.967   | 1.03 (0.85-1.25) | 0.738   |
| Dyslipidemia with < 365 days           | 54/473 (11.42)  | 126/1,892 (6.66)    | 1.87 (1.32-2.65) | <0.001* | 1.76 (1.29-2.39) | <0.001* |
| Dyslipidemia with ≥ 365 days           | 47/473 (9.94)   | 149/1,892 (7.88)    | 1.37 (0.96-1.96) | 0.082   | 1.46 (1.06-2.00) | 0.02*   |

Urban residents (n= 1,950)

|                                        |                 |                   |                  |       |                  |       |
|----------------------------------------|-----------------|-------------------|------------------|-------|------------------|-------|
| Normal                                 | 197/390 (50.51) | 857/1,560 (54.94) | 1                |       | 1                |       |
| Dyslipidemia without Lipophilic statin | 120/390 (30.77) | 485/1,560 (31.09) | 1.08 (0.84-1.39) | 0.568 | 1.09 (0.88-1.34) | 0.431 |

|                                        |                 |                     |                  |         |                  |         |
|----------------------------------------|-----------------|---------------------|------------------|---------|------------------|---------|
| Dyslipidemia with < 365 days           | 33/390 (8.46)   | 108/1,560 (6.92)    | 1.33 (0.87-2.02) | 0.184   | 1.34 (0.94-1.91) | 0.107   |
| Dyslipidemia with ≥ 365 days           | 40/390 (10.26)  | 110/1,560 (7.05)    | 1.58 (1.07-2.35) | 0.022*  | 1.62 (1.13-2.32) | 0.009*  |
| Rural residents (n= 2,155)             |                 |                     |                  |         |                  |         |
| Normal                                 | 238/431 (55.22) | 1,004/1,724 (58.24) | 1                |         | 1                |         |
| Dyslipidemia without Lipophilic statin | 109/431 (25.29) | 496/1,724 (28.77)   | 0.93 (0.72-1.19) | 0.554   | 0.95 (0.77-1.17) | 0.645   |
| Dyslipidemia with < 365 days           | 47/431 (10.9)   | 100/1,724 (5.8)     | 1.98 (1.36-2.88) | <0.001* | 1.85 (1.32-2.59) | <0.001* |
| Dyslipidemia with ≥ 365 days           | 37/431 (8.58)   | 124/1,724 (7.19)    | 1.26 (0.85-1.87) | 0.252   | 1.28 (0.91-1.81) | 0.155   |
| CCI scores = 0 (n= 2,903)              |                 |                     |                  |         |                  |         |
| Normal                                 | 269/460 (58.48) | 1,470/2,443 (60.17) | 1                |         | 1                |         |
| Dyslipidemia without Lipophilic statin | 127/460 (27.61) | 686/2,443 (28.08)   | 1.01 (0.80-1.27) | 0.921   | 1.02 (0.85-1.22) | 0.849   |
| Dyslipidemia with < 365 days           | 33/460 (7.17)   | 134/2,443 (5.49)    | 1.35 (0.90-2.01) | 0.148   | 1.35 (0.98-1.87) | 0.066   |
| Dyslipidemia with ≥ 365 days           | 31/460 (6.74)   | 153/2,443 (6.26)    | 1.11 (0.74-1.66) | 0.624   | 1.11 (0.81-1.54) | 0.511   |
| CCI scores = 1 (n= 550)                |                 |                     |                  |         |                  |         |
| Normal                                 | 50/113 (44.25)  | 202/437 (46.22)     | 1                |         | 1                |         |
| Dyslipidemia without Lipophilic statin | 32/113 (28.32)  | 161/437 (36.84)     | 0.80 (0.49-1.31) | 0.38    | 0.84 (0.56-1.25) | 0.392   |
| Dyslipidemia with < 365 days           | 17/113 (15.04)  | 40/437 (9.15)       | 1.72 (0.90-3.28) | 0.101   | 2.14 (1.19-3.85) | 0.011*  |
| Dyslipidemia with ≥ 365 days           | 14/113 (12.39)  | 34/437 (7.78)       | 1.66 (0.83-3.33) | 0.151   | 2.36 (1.22-4.56) | 0.01*   |
| CCI scores ≥ 2 (n= 652)                |                 |                     |                  |         |                  |         |
| Normal                                 | 116/248 (46.77) | 189/404 (46.78)     | 1                |         | 1                |         |

|                                        |                 |                     |                  |        |                  |        |
|----------------------------------------|-----------------|---------------------|------------------|--------|------------------|--------|
| Dyslipidemia without Lipophilic statin | 70/248 (28.23)  | 134/404 (33.17)     | 0.85 (0.59-1.23) | 0.393  | 1.00 (0.69-1.45) | 1      |
| Dyslipidemia with < 365 days           | 30/248 (12.1)   | 34/404 (8.42)       | 1.44 (0.84-2.47) | 0.19   | 1.62 (0.94-2.80) | 0.082  |
| Dyslipidemia with ≥ 365 days           | 32/248 (12.9)   | 47/404 (11.63)      | 1.11 (0.67-1.84) | 0.687  | 1.59 (0.93-2.72) | 0.089  |
| Non-diabetes history (n= 3,057)        |                 |                     |                  |        |                  |        |
| Normal                                 | 372/582 (63.92) | 1,639/2,475 (66.22) | 1                |        | 1                |        |
| Dyslipidemia without Lipophilic statin | 144/582 (24.74) | 631/2,475 (25.49)   | 1.01 (0.81-1.24) | 0.96   | 1.07 (0.90-1.27) | 0.454  |
| Dyslipidemia with < 365 days           | 37/582 (6.36)   | 112/2,475 (4.53)    | 1.46 (0.99-2.15) | 0.058  | 1.47 (1.06-2.03) | 0.022* |
| Dyslipidemia with ≥ 365 days           | 29/582 (4.98)   | 93/2,475 (3.76)     | 1.37 (0.89-2.12) | 0.149  | 1.61 (1.11-2.33) | 0.011* |
| Diabetes history (n= 1,048)            |                 |                     |                  |        |                  |        |
| Normal                                 | 63/239 (26.36)  | 222/809 (27.44)     | 1                |        | 1                |        |
| Dyslipidemia without Lipophilic statin | 85/239 (35.56)  | 350/809 (43.26)     | 0.86 (0.59-1.23) | 0.405  | 0.95 (0.70-1.29) | 0.757  |
| Dyslipidemia with < 365 days           | 43/239 (17.99)  | 96/809 (11.87)      | 1.58 (1.00-2.49) | 0.049* | 1.72 (1.16-2.56) | 0.007* |
| Dyslipidemia with ≥ 365 days           | 48/239 (20.08)  | 141/809 (17.43)     | 1.20 (0.78-1.85) | 0.408  | 1.28 (0.88-1.86) | 0.197  |

---

Abbreviations: CCI, Charlson Comorbidity Index;

\* Significance at  $P < 0.05$

† Adjusted for age, sex, income, region of residence, CCI scores and diabetes history
