# Supplementary material for: Association between the Use of Statins and Brain Tumors
Source: MDPI journal article supplement (doi:10.3390/biomedicines11082247), 2023-08-10
Supplement: s1 [file s1]

**Table S4.** Crude and overlap propensity score weighted odd ratios of dates of any statin prescription for malignant brain tumor.

| Characteristics               | N of                                         | N of                           | Odd ratios for malignant brain tumor (95% confidence interval) |         |                          |         |
|-------------------------------|----------------------------------------------|--------------------------------|----------------------------------------------------------------|---------|--------------------------|---------|
|                               | Malignant brain tumor<br>(exposure/total, %) | Control<br>(exposure/total, %) | Crude                                                          | P-value | Overlap weighted model † | P-value |
| Age < 55 years old (n= 2,505) |                                              |                                |                                                                |         |                          |         |
| Normal                        | 392/501 (78.24)                              | 1,574/2,004 (78.54)            | 1                                                              |         | 1                        |         |
| Dyslipidemia without Statin   | 77/501 (15.37)                               | 344/2,004 (17.17)              | 0.90 (0.69-1.18)                                               | 0.44    | 0.96 (0.77-1.19)         | 0.683   |
| Dyslipidemia with < 365 days  | 19/501 (3.79)                                | 50/2,004 (2.5)                 | 1.53 (0.89-2.62)                                               | 0.124   | 3.15 (1.85-5.38)         | <0.001* |
| Dyslipidemia with ≥ 365 days  | 13/501 (2.59)                                | 36/2,004 (1.8)                 | 1.45 (0.76-2.76)                                               | 0.257   | 1.11 (0.64-1.94)         | 0.702   |
| Age ≥ 55 years old (n= 2,855) |                                              |                                |                                                                |         |                          |         |
| Normal                        | 333/571 (58.32)                              | 1,022/2,284 (44.75)            | 1                                                              |         | 1                        |         |
| Dyslipidemia without Statin   | 81/571 (14.19)                               | 651/2,284 (28.5)               | 0.38 (0.29-0.50)                                               | <0.001* | 0.44 (0.36-0.54)         | <0.001* |
| Dyslipidemia with < 365 days  | 69/571 (12.08)                               | 228/2,284 (9.98)               | 0.93 (0.69-1.25)                                               | 0.625   | 1.20 (0.94-1.54)         | 0.146   |
| Dyslipidemia with ≥ 365 days  | 88/571 (15.41)                               | 383/2,284 (16.77)              | 0.71 (0.54-0.92)                                               | 0.009*  | 0.92 (0.75-1.14)         | 0.463   |
| Male (n= 2,745)               |                                              |                                |                                                                |         |                          |         |
| Normal                        | 391/549 (71.22)                              | 1,406/2,196 (64.03)            | 1                                                              |         | 1                        |         |
| Dyslipidemia without Statin   | 82/549 (14.94)                               | 507/2,196 (23.09)              | 0.58 (0.45-0.75)                                               | <0.001* | 0.68 (0.56-0.83)         | <0.001* |
| Dyslipidemia with < 365 days  | 41/549 (7.47)                                | 105/2,196 (4.78)               | 1.40 (0.96-2.05)                                               | 0.078   | 1.72 (1.25-2.39)         | 0.001*  |
| Dyslipidemia with ≥ 365 days  | 35/549 (6.38)                                | 178/2,196 (8.11)               | 0.71 (0.48-1.03)                                               | 0.073   | 0.93 (0.71-1.23)         | 0.627   |
| Female (n= 2,615)             |                                              |                                |                                                                |         |                          |         |
| Normal                        | 334/523 (63.86)                              | 1,190/2,092 (56.88)            | 1                                                              |         | 1                        |         |

|                               |                 |                     |                  |         |                  |         |
|-------------------------------|-----------------|---------------------|------------------|---------|------------------|---------|
| Dyslipidemia without Statin   | 76/523 (14.53)  | 488/2,092 (23.33)   | 0.55 (0.42-0.73) | <0.001* | 0.61 (0.49-0.76) | <0.001* |
| Dyslipidemia with < 365 days  | 47/523 (8.99)   | 173/2,092 (8.27)    | 0.97 (0.69-1.37) | 0.853   | 1.47 (1.09-1.97) | 0.012*  |
| Dyslipidemia with ≥ 365 days  | 66/523 (12.62)  | 241/2,092 (11.52)   | 0.98 (0.72-1.31) | 0.872   | 1.23 (0.94-1.60) | 0.128   |
| Low income groups (n= 2,520)  |                 |                     |                  |         |                  |         |
| Normal                        | 349/504 (69.25) | 1,254/2,016 (62.2)  | 1                |         | 1                |         |
| Dyslipidemia without Statin   | 65/504 (12.9)   | 448/2,016 (22.22)   | 0.52 (0.39-0.69) | <0.001* | 0.72 (0.58-0.89) | 0.003*  |
| Dyslipidemia with < 365 days  | 44/504 (8.73)   | 119/2,016 (5.9)     | 1.33 (0.92-1.91) | 0.128   | 2.01 (1.44-2.81) | <0.001* |
| Dyslipidemia with ≥ 365 days  | 46/504 (9.13)   | 195/2,016 (9.67)    | 0.85 (0.60-1.19) | 0.344   | 1.07 (0.82-1.40) | 0.633   |
| High income groups (n= 2,840) |                 |                     |                  |         |                  |         |
| Normal                        | 376/568 (66.2)  | 1,342/2,272 (59.07) | 1                |         | 1                |         |
| Dyslipidemia without Statin   | 93/568 (16.37)  | 547/2,272 (24.08)   | 0.61 (0.47-0.78) | <0.001* | 0.59 (0.48-0.72) | <0.001* |
| Dyslipidemia with < 365 days  | 44/568 (7.75)   | 159/2,272 (7.00)    | 0.99 (0.69-1.41) | 0.945   | 1.33 (0.99-1.78) | 0.056   |
| Dyslipidemia with ≥ 365 days  | 55/568 (9.68)   | 224/2,272 (9.86)    | 0.88 (0.64-1.20) | 0.414   | 1.15 (0.88-1.51) | 0.315   |
| Urban residents (n= 2,295)    |                 |                     |                  |         |                  |         |
| Normal                        | 309/459 (67.32) | 1,101/1,836 (59.97) | 1                |         | 1                |         |
| Dyslipidemia without Statin   | 69/459 (15.03)  | 436/1,836 (23.75)   | 0.56 (0.42-0.75) | <0.001* | 0.68 (0.55-0.85) | <0.001* |
| Dyslipidemia with < 365 days  | 38/459 (8.28)   | 107/1,836 (5.83)    | 1.27 (0.86-1.87) | 0.238   | 2.51 (1.75-3.59) | <0.001* |
| Dyslipidemia with ≥ 365 days  | 43/459 (9.37)   | 192/1,836 (10.46)   | 0.80 (0.56-1.14) | 0.211   | 0.87 (0.65-1.16) | 0.342   |
| Rural residents (n= 3,065)    |                 |                     |                  |         |                  |         |
| Normal                        | 416/613 (67.86) | 1,495/2,452 (60.97) | 1                |         | 1                |         |

|                                 |                 |                     |                  |         |                  |         |
|---------------------------------|-----------------|---------------------|------------------|---------|------------------|---------|
| Dyslipidemia without Statin     | 89/613 (14.52)  | 559/2,452 (22.8)    | 0.57 (0.45-0.73) | <0.001* | 0.61 (0.51-0.74) | <0.001* |
| Dyslipidemia with < 365 days    | 50/613 (8.16)   | 171/2,452 (6.97)    | 1.05 (0.75-1.47) | 0.771   | 1.19 (0.90-1.58) | 0.228   |
| Dyslipidemia with ≥ 365 days    | 58/613 (9.46)   | 227/2,452 (9.26)    | 0.92 (0.67-1.25) | 0.587   | 1.34 (1.04-1.73) | 0.024*  |
| CCI scores = 0 (n= 3,238)       |                 |                     |                  |         |                  |         |
| Normal                          | 56/98 (57.14)   | 2,025/3,140 (64.49) | 1                |         | 1                |         |
| Dyslipidemia without Statin     | 19/98 (19.39)   | 691/3,140 (22.01)   | 0.99 (0.59-1.68) | 0.983   | 1.36 (1.10-1.67) | 0.004*  |
| Dyslipidemia with < 365 days    | 16/98 (16.33)   | 183/3,140 (5.83)    | 3.16 (1.78-5.62) | <0.001* | 4.68 (3.47-6.32) | <0.001* |
| Dyslipidemia with ≥ 365 days    | 7/98 (7.14)     | 241/3,140 (7.68)    | 1.05 (0.47-2.33) | 0.904   | 1.78 (1.25-2.52) | 0.001*  |
| CCI scores = 1 (n= 597)         |                 |                     |                  |         |                  |         |
| Normal                          | 13/36 (36.11)   | 285/561 (50.8)      | 1                |         | 1                |         |
| Dyslipidemia without Statin     | 8/36 (22.22)    | 139/561 (24.78)     | 1.26 (0.51-3.12) | 0.614   | 1.73 (1.08-2.77) | 0.022*  |
| Dyslipidemia with < 365 days    | 4/36 (11.11)    | 52/561 (9.27)       | 1.69 (0.53-5.37) | 0.377   | 2.68 (1.40-5.15) | 0.003*  |
| Dyslipidemia with ≥ 365 days    | 11/36 (30.56)   | 85/561 (15.15)      | 2.84 (1.23-6.56) | 0.015*  | 5.67 (3.24-9.92) | <0.001* |
| CCI scores ≥ 2 (n= 1,525)       |                 |                     |                  |         |                  |         |
| Normal                          | 656/938 (69.94) | 286/587 (48.72)     | 1                |         | 1                |         |
| Dyslipidemia without Statin     | 131/938 (13.97) | 165/587 (28.11)     | 0.35 (0.26-0.45) | <0.001* | 0.41 (0.31-0.54) | <0.001* |
| Dyslipidemia with < 365 days    | 68/938 (7.25)   | 43/587 (7.33)       | 0.69 (0.46-1.04) | 0.073   | 1.13 (0.74-1.73) | 0.575   |
| Dyslipidemia with ≥ 365 days    | 83/938 (8.85)   | 93/587 (15.84)      | 0.39 (0.28-0.54) | <0.001* | 0.78 (0.56-1.10) | 0.152   |
| Non-diabetes history (n= 3,984) |                 |                     |                  |         |                  |         |
| Normal                          | 599/785 (76.31) | 2,258/3,199 (70.58) | 1                |         | 1                |         |

|                              |                |                   |                  |         |                  |         |
|------------------------------|----------------|-------------------|------------------|---------|------------------|---------|
| Dyslipidemia without Statin  | 95/785 (12.1)  | 619/3,199 (19.35) | 0.58 (0.46-0.73) | <0.001* | 0.66 (0.55-0.79) | <0.001* |
| Dyslipidemia with < 365 days | 46/785 (5.86)  | 146/3,199 (4.56)  | 1.19 (0.84-1.67) | 0.326   | 1.57 (1.17-2.10) | 0.003*  |
| Dyslipidemia with ≥ 365 days | 45/785 (5.73)  | 176/3,199 (5.5)   | 0.96 (0.69-1.35) | 0.832   | 0.89 (0.68-1.16) | 0.38    |
| Diabetes history (n= 1,376)  |                |                   |                  |         |                  |         |
| Normal                       | 126/287 (43.9) | 338/1,089 (31.04) | 1                |         | 1                |         |
| Dyslipidemia without Statin  | 63/287 (21.95) | 376/1,089 (34.53) | 0.45 (0.32-0.63) | <0.001* | 0.56 (0.42-0.73) | <0.001* |
| Dyslipidemia with < 365 days | 42/287 (14.63) | 132/1,089 (12.12) | 0.85 (0.57-1.28) | 0.441   | 1.42 (0.99-2.02) | 0.055   |
| Dyslipidemia with ≥ 365 days | 56/287 (19.51) | 243/1,089 (22.31) | 0.62 (0.43-0.88) | 0.008*  | 1.13 (0.83-1.53) | 0.441   |

---

Abbreviations: CCI, Charlson Comorbidity Index;

\* Significance at  $P < 0.05$

† Adjusted for age, sex, income, region of residence, CCI scores and diabetes history.
