# Supplementary material for: Association between the Use of Statins and Brain Tumors
Source: MDPI journal article supplement (doi:10.3390/biomedicines11082247), 2023-08-10
Supplement: s1 [file s1]

**Table S2.** Crude and overlap propensity score weighted odd ratios of dates of Lipophilic statin prescription for any brain tumor.

| Characteristics                        | N of<br>Any brain tumor<br>(exposure/total, %) | N of<br>Control<br>(exposure/total, %) | Odd ratios for any brain tumor (95% confidence interval) |         |                          |         |
|----------------------------------------|------------------------------------------------|----------------------------------------|----------------------------------------------------------|---------|--------------------------|---------|
|                                        |                                                |                                        | Crude                                                    | P-value | Overlap weighted model † | P-value |
| Age < 55 years old (n= 4,485)          |                                                |                                        |                                                          |         |                          |         |
| Normal                                 | 667/897 (74.36)                                | 2,710/3,588 (75.53)                    | 1                                                        |         | 1                        |         |
| Dyslipidemia without Lipophilic statin | 176/897 (19.62)                                | 732/3,588 (20.4)                       | 0.98 (0.81-1.18)                                         | 0.804   | 0.94 (0.81-1.09)         | 0.419   |
| Dyslipidemia with < 365 days           | 34/897 (3.79)                                  | 98/3,588 (2.73)                        | 1.41 (0.95-2.10)                                         | 0.092   | 1.67 (1.16-2.39)         | 0.005*  |
| Dyslipidemia with ≥ 365 days           | 20/897 (2.23)                                  | 48/3,588 (1.34)                        | 1.69 (1.00-2.87)                                         | 0.05    | 1.37 (0.88-2.14)         | 0.164   |
| Age ≥ 55 years old (n= 4,980)          |                                                |                                        |                                                          |         |                          |         |
| Normal                                 | 493/996 (49.5)                                 | 1,747/3,984 (43.85)                    | 1                                                        |         | 1                        |         |
| Dyslipidemia without Lipophilic statin | 242/996 (24.3)                                 | 1,399/3,984 (35.12)                    | 0.61 (0.52-0.73)                                         | <0.001* | 0.74 (0.65-0.85)         | <0.001* |
| Dyslipidemia with < 365 days           | 129/996 (12.95)                                | 363/3,984 (9.11)                       | 1.26 (1.01-1.58)                                         | 0.044*  | 1.40 (1.16-1.70)         | <0.001* |
| Dyslipidemia with ≥ 365 days           | 132/996 (13.25)                                | 475/3,984 (11.92)                      | 0.98 (0.79-1.22)                                         | 0.89    | 1.17 (0.98-1.40)         | 0.088   |
| Male (n= 4,275)                        |                                                |                                        |                                                          |         |                          |         |
| Normal                                 | 565/855 (66.08)                                | 2,175/3,420 (63.6)                     | 1                                                        |         | 1                        |         |
| Dyslipidemia without Lipophilic statin | 175/855 (20.47)                                | 905/3,420 (26.46)                      | 0.74 (0.62-0.90)                                         | 0.002*  | 0.86 (0.74-1.00)         | 0.058   |
| Dyslipidemia with < 365 days           | 63/855 (7.37)                                  | 163/3,420 (4.77)                       | 1.49 (1.10-2.02)                                         | 0.011*  | 1.86 (1.42-2.44)         | <0.001* |
| Dyslipidemia with ≥ 365 days           | 52/855 (6.08)                                  | 177/3,420 (5.18)                       | 1.13 (0.82-1.56)                                         | 0.455   | 1.39 (1.07-1.80)         | 0.014*  |

Female (n= 5,190)

|                                        |                   |                     |                  |        |                  |        |
|----------------------------------------|-------------------|---------------------|------------------|--------|------------------|--------|
| Normal                                 | 595/1,038 (57.32) | 2,282/4,152 (54.96) | 1                |        | 1                |        |
| Dyslipidemia without Lipophilic statin | 243/1,038 (23.41) | 1,226/4,152 (29.53) | 0.76 (0.64-0.90) | 0.001* | 0.85 (0.74-0.97) | 0.017* |
| Dyslipidemia with < 365 days           | 100/1,038 (9.63)  | 298/4,152 (7.18)    | 1.29 (1.01-1.64) | 0.042* | 1.35 (1.09-1.66) | 0.005* |
| Dyslipidemia with ≥ 365 days           | 100/1,038 (9.63)  | 346/4,152 (8.33)    | 1.11 (0.87-1.41) | 0.401  | 1.17 (0.95-1.45) | 0.139  |

Low income groups (n= 4,260)

|                                        |                 |                    |                  |         |                  |         |
|----------------------------------------|-----------------|--------------------|------------------|---------|------------------|---------|
| Normal                                 | 550/852 (64.55) | 2,096/3,408 (61.5) | 1                |         | 1                |         |
| Dyslipidemia without Lipophilic statin | 168/852 (19.72) | 912/3,408 (26.76)  | 0.70 (0.58-0.85) | <0.001* | 0.85 (0.73-0.98) | 0.031*  |
| Dyslipidemia with < 365 days           | 70/852 (8.22)   | 186/3,408 (5.46)   | 1.43 (1.07-1.92) | 0.015*  | 1.75 (1.35-2.27) | <0.001* |
| Dyslipidemia with ≥ 365 days           | 64/852 (7.51)   | 214/3,408 (6.28)   | 1.14 (0.85-1.53) | 0.384   | 1.22 (0.96-1.56) | 0.11    |

High income groups (n= 5,205)

|                                        |                   |                     |                  |        |                  |        |
|----------------------------------------|-------------------|---------------------|------------------|--------|------------------|--------|
| Normal                                 | 610/1,041 (58.6)  | 2,361/4,164 (56.7)  | 1                |        | 1                |        |
| Dyslipidemia without Lipophilic statin | 250/1,041 (24.02) | 1,219/4,164 (29.27) | 0.79 (0.67-0.93) | 0.005* | 0.86 (0.75-0.98) | 0.026* |
| Dyslipidemia with < 365 days           | 93/1,041 (8.93)   | 275/4,164 (6.6)     | 1.31 (1.02-1.68) | 0.036* | 1.40 (1.13-1.73) | 0.002* |
| Dyslipidemia with ≥ 365 days           | 88/1,041 (8.45)   | 309/4,164 (7.42)    | 1.10 (0.86-1.42) | 0.451  | 1.32 (1.05-1.64) | 0.015* |

Urban residents (n= 4,245)

|                                        |                 |                     |                  |        |                  |       |
|----------------------------------------|-----------------|---------------------|------------------|--------|------------------|-------|
| Normal                                 | 506/849 (59.6)  | 1,958/3,396 (57.66) | 1                |        | 1                |       |
| Dyslipidemia without Lipophilic statin | 202/849 (23.79) | 976/3,396 (28.74)   | 0.80 (0.67-0.96) | 0.016* | 0.92 (0.79-1.07) | 0.264 |

|                                        |                   |                     |                  |         |                  |         |
|----------------------------------------|-------------------|---------------------|------------------|---------|------------------|---------|
| Dyslipidemia with < 365 days           | 70/849 (8.24)     | 212/3,396 (6.24)    | 1.28 (0.96-1.70) | 0.094   | 1.59 (1.24-2.03) | <0.001* |
| Dyslipidemia with ≥ 365 days           | 71/849 (8.36)     | 250/3,396 (7.36)    | 1.10 (0.83-1.46) | 0.511   | 1.19 (0.93-1.52) | 0.167   |
| Rural residents (n= 5,220)             |                   |                     |                  |         |                  |         |
| Normal                                 | 654/1,044 (62.64) | 2,499/4,176 (59.84) | 1                |         | 1                |         |
| Dyslipidemia without Lipophilic statin | 216/1,044 (20.69) | 1,155/4,176 (27.66) | 0.71 (0.60-0.85) | <0.001* | 0.80 (0.70-0.92) | 0.001*  |
| Dyslipidemia with < 365 days           | 93/1,044 (8.91)   | 249/4,176 (5.96)    | 1.43 (1.11-1.84) | 0.006*  | 1.48 (1.19-1.84) | <0.001* |
| Dyslipidemia with ≥ 365 days           | 81/1,044 (7.76)   | 273/4,176 (6.54)    | 1.13 (0.87-1.47) | 0.349   | 1.36 (1.09-1.70) | 0.007*  |
| CCI scores = 0 (n= 6,141)              |                   |                     |                  |         |                  |         |
| Normal                                 | 325/558 (58.24)   | 3,495/5,583 (62.6)  | 1                |         | 1                |         |
| Dyslipidemia without Lipophilic statin | 149/558 (26.7)    | 1,474/5,583 (26.4)  | 1.09 (0.89-1.33) | 0.421   | 1.08 (0.95-1.23) | 0.248   |
| Dyslipidemia with < 365 days           | 49/558 (8.78)     | 295/5,583 (5.28)    | 1.79 (1.29-2.47) | <0.001* | 1.78 (1.43-2.23) | <0.001* |
| Dyslipidemia with ≥ 365 days           | 35/558 (6.27)     | 319/5,583 (5.71)    | 1.18 (0.82-1.70) | 0.377   | 1.22 (0.96-1.56) | 0.105   |
| CCI scores = 1 (n= 1,147)              |                   |                     |                  |         |                  |         |
| Normal                                 | 63/149 (42.28)    | 487/998 (48.8)      | 1                |         | 1                |         |
| Dyslipidemia without Lipophilic statin | 42/149 (28.19)    | 327/998 (32.77)     | 0.99 (0.66-1.50) | 0.973   | 1.06 (0.80-1.41) | 0.683   |
| Dyslipidemia with < 365 days           | 22/149 (14.77)    | 95/998 (9.52)       | 1.79 (1.05-3.05) | 0.032*  | 2.30 (1.53-3.47) | <0.001* |
| Dyslipidemia with ≥ 365 days           | 22/149 (14.77)    | 89/998 (8.92)       | 1.91 (1.12-3.26) | 0.018*  | 2.69 (1.74-4.17) | <0.001* |
| CCI scores ≥ 2 (n= 2,177)              |                   |                     |                  |         |                  |         |
| Normal                                 | 772/1,186 (65.09) | 475/991 (47.93)     | 1                |         | 1                |         |

|                                        |                   |                     |                  |         |                  |         |
|----------------------------------------|-------------------|---------------------|------------------|---------|------------------|---------|
| Dyslipidemia without Lipophilic statin | 227/1,186 (19.14) | 330/991 (33.3)      | 0.42 (0.35-0.52) | <0.001* | 0.56 (0.45-0.69) | <0.001* |
| Dyslipidemia with < 365 days           | 92/1,186 (7.76)   | 71/991 (7.16)       | 0.80 (0.57-1.11) | 0.178   | 1.13 (0.80-1.59) | 0.484   |
| Dyslipidemia with ≥ 365 days           | 95/1,186 (8.01)   | 115/991 (11.6)      | 0.51 (0.38-0.68) | <0.001* | 1.00 (0.74-1.37) | 0.987   |
| Non-diabetes history (n= 7,041)        |                   |                     |                  |         |                  |         |
| Normal                                 | 971/1,367 (71.03) | 3,897/5,674 (68.68) | 1                |         | 1                |         |
| Dyslipidemia without Lipophilic statin | 252/1,367 (18.43) | 1,321/5,674 (23.28) | 0.77 (0.66-0.89) | <0.001* | 0.87 (0.77-0.98) | 0.024*  |
| Dyslipidemia with < 365 days           | 83/1,367 (6.07)   | 242/5,674 (4.27)    | 1.38 (1.06-1.78) | 0.015*  | 1.44 (1.16-1.80) | 0.001*  |
| Dyslipidemia with ≥ 365 days           | 61/1,367 (4.46)   | 214/5,674 (3.77)    | 1.14 (0.85-1.53) | 0.368   | 1.31 (1.04-1.67) | 0.024*  |
| Diabetes history (n= 2,424)            |                   |                     |                  |         |                  |         |
| Normal                                 | 189/526 (35.93)   | 560/1,898 (29.5)    | 1                |         | 1                |         |
| Dyslipidemia without Lipophilic statin | 166/526 (31.56)   | 810/1,898 (42.68)   | 0.61 (0.48-0.77) | <0.001* | 0.78 (0.64-0.95) | 0.013*  |
| Dyslipidemia with < 365 days           | 80/526 (15.21)    | 219/1,898 (11.54)   | 1.08 (0.80-1.47) | 0.61    | 1.49 (1.14-1.94) | 0.003*  |
| Dyslipidemia with ≥ 365 days           | 91/526 (17.3)     | 309/1,898 (16.28)   | 0.87 (0.66-1.16) | 0.35    | 1.15 (0.90-1.47) | 0.266   |

---

Abbreviations: CCI, Charlson Comorbidity Index;

\* Significance at  $P < 0.05$

† Adjusted for age, sex, income, region of residence, CCI scores and diabetes history
