# Supplementary material for: Association between the Use of Statins and Brain Tumors
Source: MDPI journal article supplement (doi:10.3390/biomedicines11082247), 2023-08-10
Supplement: s1 [file s1]

**S7 table** Crude and overlap propensity score weighted odd ratios of dates of any statin prescription for benign brain tumor

| Characteristics               | N of<br>Benign brain tumor | N of<br>Control     | Odd ratios for benign brain tumor (95% confidence interval) |         |                          |         |
|-------------------------------|----------------------------|---------------------|-------------------------------------------------------------|---------|--------------------------|---------|
|                               | (exposure/total, %)        | (exposure/total, %) | Crude                                                       | P-value | Overlap weighted model † | P-value |
| Age < 55 years old (n= 1,980) |                            |                     |                                                             |         |                          |         |
| Normal                        | 275/396 (69.44)            | 1,136/1,584 (71.72) | 1                                                           |         | 1                        |         |
| Dyslipidemia without Statin   | 85/396 (21.46)             | 351/1,584 (22.16)   | 1.00 (0.76-1.31)                                            | 0.998   | 0.94 (0.75-1.17)         | 0.564   |
| Dyslipidemia with < 365 days  | 24/396 (6.06)              | 58/1,584 (3.66)     | 1.71 (1.04-2.80)                                            | 0.033*  | 1.64 (1.05-2.55)         | 0.03*   |
| Dyslipidemia with ≥ 365 days  | 12/396 (3.03)              | 39/1,584 (2.46)     | 1.27 (0.66-2.46)                                            | 0.476   | 1.19 (0.69-2.07)         | 0.535   |
| Age ≥ 55 years old (n= 2,125) |                            |                     |                                                             |         |                          |         |
| Normal                        | 160/425 (37.65)            | 725/1,700 (42.65)   | 1                                                           |         | 1                        |         |
| Dyslipidemia without Statin   | 106/425 (24.94)            | 514/1,700 (30.24)   | 0.93 (0.71-1.22)                                            | 0.623   | 0.95 (0.77-1.18)         | 0.658   |
| Dyslipidemia with < 365 days  | 72/425 (16.94)             | 173/1,700 (10.18)   | 1.89 (1.36-2.61)                                            | <0.001* | 1.80 (1.37-2.38)         | <0.001* |
| Dyslipidemia with ≥ 365 days  | 87/425 (20.47)             | 288/1,700 (16.94)   | 1.37 (1.02-1.84)                                            | 0.037*  | 1.37 (1.07-1.76)         | 0.012*  |
| Male (n= 1,530)               |                            |                     |                                                             |         |                          |         |
| Normal                        | 174/306 (56.86)            | 769/1,224 (62.83)   | 1                                                           |         | 1                        |         |
| Dyslipidemia without Statin   | 67/306 (21.9)              | 289/1,224 (23.61)   | 1.02 (0.75-1.40)                                            | 0.879   | 1.12 (0.86-1.46)         | 0.386   |
| Dyslipidemia with < 365 days  | 29/306 (9.48)              | 72/1,224 (5.88)     | 1.78 (1.12-2.82)                                            | 0.014*  | 2.08 (1.37-3.15)         | <0.001* |
| Dyslipidemia with ≥ 365 days  | 36/306 (11.76)             | 94/1,224 (7.68)     | 1.69 (1.11-2.57)                                            | 0.014*  | 1.97 (1.35-2.89)         | <0.001* |
| Female (n= 2,575)             |                            |                     |                                                             |         |                          |         |
| Normal                        | 261/515 (50.68)            | 1,092/2,060 (53.01) | 1                                                           |         | 1                        |         |

|                               |                 |                     |                  |         |                  |         |
|-------------------------------|-----------------|---------------------|------------------|---------|------------------|---------|
| Dyslipidemia without Statin   | 124/515 (24.08) | 576/2,060 (27.96)   | 0.90 (0.71-1.14) | 0.386   | 0.89 (0.73-1.08) | 0.233   |
| Dyslipidemia with < 365 days  | 67/515 (13.01)  | 159/2,060 (7.72)    | 1.76 (1.29-2.42) | <0.001* | 1.62 (1.22-2.14) | <0.001* |
| Dyslipidemia with ≥ 365 days  | 63/515 (12.23)  | 233/2,060 (11.31)   | 1.13 (0.83-1.54) | 0.435   | 1.10 (0.84-1.45) | 0.486   |
| Low income groups (n= 1,740)  |                 |                     |                  |         |                  |         |
| Normal                        | 201/348 (57.76) | 842/1,392 (60.49)   | 1                |         | 1                |         |
| Dyslipidemia without Statin   | 78/348 (22.41)  | 339/1,392 (24.35)   | 0.96 (0.72-1.29) | 0.804   | 0.94 (0.74-1.20) | 0.631   |
| Dyslipidemia with < 365 days  | 33/348 (9.48)   | 90/1,392 (6.47)     | 1.54 (1.00-2.36) | 0.049*  | 1.56 (1.07-2.28) | 0.022*  |
| Dyslipidemia with ≥ 365 days  | 36/348 (10.34)  | 121/1,392 (8.69)    | 1.25 (0.83-1.86) | 0.284   | 1.19 (0.83-1.70) | 0.338   |
| High income groups (n= 2,365) |                 |                     |                  |         |                  |         |
| Normal                        | 234/473 (49.47) | 1,019/1,892 (53.86) | 1                |         | 1                |         |
| Dyslipidemia without Statin   | 113/473 (23.89) | 526/1,892 (27.8)    | 0.94 (0.73-1.20) | 0.598   | 0.96 (0.78-1.17) | 0.677   |
| Dyslipidemia with < 365 days  | 63/473 (13.32)  | 141/1,892 (7.45)    | 1.95 (1.40-2.70) | <0.001* | 1.88 (1.40-2.52) | <0.001* |
| Dyslipidemia with ≥ 365 days  | 63/473 (13.32)  | 206/1,892 (10.89)   | 1.33 (0.97-1.83) | 0.075   | 1.45 (1.09-1.92) | 0.011*  |
| Urban residents (n= 1,950)    |                 |                     |                  |         |                  |         |
| Normal                        | 197/390 (50.51) | 857/1,560 (54.94)   | 1                |         | 1                |         |
| Dyslipidemia without Statin   | 102/390 (26.15) | 421/1,560 (26.99)   | 1.05 (0.81-1.38) | 0.699   | 1.06 (0.85-1.32) | 0.604   |
| Dyslipidemia with < 365 days  | 40/390 (10.26)  | 124/1,560 (7.95)    | 1.40 (0.95-2.07) | 0.087   | 1.40 (1.00-1.96) | 0.047*  |
| Dyslipidemia with ≥ 365 days  | 51/390 (13.08)  | 158/1,560 (10.13)   | 1.40 (0.99-2.00) | 0.058   | 1.45 (1.06-2.00) | 0.022*  |
| Rural residents (n= 2,155)    |                 |                     |                  |         |                  |         |
| Normal                        | 238/431 (55.22) | 1,004/1,724 (58.24) | 1                |         | 1                |         |

|                                 |                 |                     |                  |         |                  |         |
|---------------------------------|-----------------|---------------------|------------------|---------|------------------|---------|
| Dyslipidemia without Statin     | 89/431 (20.65)  | 444/1,724 (25.75)   | 0.85 (0.65-1.11) | 0.22    | 0.86 (0.69-1.07) | 0.185   |
| Dyslipidemia with < 365 days    | 56/431 (12.99)  | 107/1,724 (6.21)    | 2.21 (1.55-3.14) | <0.001* | 2.15 (1.55-2.97) | <0.001* |
| Dyslipidemia with ≥ 365 days    | 48/431 (11.14)  | 169/1,724 (9.8)     | 1.20 (0.84-1.70) | 0.312   | 1.25 (0.92-1.70) | 0.158   |
| CCI scores = 0 (n= 2,903)       |                 |                     |                  |         |                  |         |
| Normal                          | 269/460 (58.48) | 1,470/2,443 (60.17) | 1                |         | 1                |         |
| Dyslipidemia without Statin     | 108/460 (23.48) | 603/2,443 (24.68)   | 0.98 (0.77-1.25) | 0.862   | 0.98 (0.81-1.19) | 0.849   |
| Dyslipidemia with < 365 days    | 38/460 (8.26)   | 159/2,443 (6.51)    | 1.31 (0.90-1.90) | 0.165   | 1.33 (0.99-1.80) | 0.062   |
| Dyslipidemia with ≥ 365 days    | 45/460 (9.78)   | 211/2,443 (8.64)    | 1.17 (0.82-1.65) | 0.387   | 1.19 (0.89-1.58) | 0.238   |
| CCI scores = 1 (n= 550)         |                 |                     |                  |         |                  |         |
| Normal                          | 50/113 (44.25)  | 202/437 (46.22)     | 1                |         | 1                |         |
| Dyslipidemia without Statin     | 25/113 (22.12)  | 141/437 (32.27)     | 0.72 (0.42-1.21) | 0.214   | 0.72 (0.47-1.09) | 0.122   |
| Dyslipidemia with < 365 days    | 23/113 (20.35)  | 37/437 (8.47)       | 2.51 (1.37-4.60) | 0.003*  | 3.09 (1.74-5.50) | <0.001* |
| Dyslipidemia with ≥ 365 days    | 15/113 (13.27)  | 57/437 (13.04)      | 1.06 (0.56-2.03) | 0.853   | 1.46 (0.81-2.61) | 0.204   |
| CCI scores ≥ 2 (n= 652)         |                 |                     |                  |         |                  |         |
| Normal                          | 116/248 (46.77) | 189/404 (46.78)     | 1                |         | 1                |         |
| Dyslipidemia without Statin     | 58/248 (23.39)  | 121/404 (29.95)     | 0.78 (0.53-1.15) | 0.213   | 0.90 (0.61-1.32) | 0.587   |
| Dyslipidemia with < 365 days    | 35/248 (14.11)  | 35/404 (8.66)       | 1.63 (0.97-2.75) | 0.067   | 1.87 (1.09-3.19) | 0.022*  |
| Dyslipidemia with ≥ 365 days    | 39/248 (15.73)  | 59/404 (14.6)       | 1.08 (0.68-1.72) | 0.755   | 1.56 (0.96-2.56) | 0.074   |
| Non-diabetes history (n= 3,057) |                 |                     |                  |         |                  |         |
| Normal                          | 372/582 (63.92) | 1,639/2,475 (66.22) | 1                |         | 1                |         |

|                              |                 |                   |                  |        |                  |        |
|------------------------------|-----------------|-------------------|------------------|--------|------------------|--------|
| Dyslipidemia without Statin  | 120/582 (20.62) | 568/2,475 (22.95) | 0.93 (0.74-1.17) | 0.536  | 0.99 (0.82-1.18) | 0.88   |
| Dyslipidemia with < 365 days | 48/582 (8.25)   | 135/2,475 (5.45)  | 1.57 (1.11-2.22) | 0.011* | 1.63 (1.21-2.20) | 0.001* |
| Dyslipidemia with ≥ 365 days | 42/582 (7.22)   | 133/2,475 (5.37)  | 1.39 (0.97-2.00) | 0.076  | 1.60 (1.17-2.19) | 0.003* |
| Diabetes history (n= 1,048)  |                 |                   |                  |        |                  |        |
| Normal                       | 63/239 (26.36)  | 222/809 (27.44)   | 1                |        | 1                |        |
| Dyslipidemia without Statin  | 71/239 (29.71)  | 297/809 (36.71)   | 0.84 (0.58-1.23) | 0.378  | 0.93 (0.68-1.28) | 0.647  |
| Dyslipidemia with < 365 days | 48/239 (20.08)  | 96/809 (11.87)    | 1.76 (1.13-2.75) | 0.013* | 1.91 (1.29-2.82) | 0.001* |
| Dyslipidemia with ≥ 365 days | 57/239 (23.85)  | 194/809 (23.98)   | 1.04 (0.69-1.56) | 0.867  | 1.14 (0.80-1.61) | 0.473  |

---

Abbreviations: CCI, Charlson Comorbidity Index;

\* Significance at  $P < 0.05$

† Adjusted for age, sex, income, region of residence, CCI scores and diabetes history.
