# Supplementary material for: Association between the Use of Statins and Brain Tumors
Source: MDPI journal article supplement (doi:10.3390/biomedicines11082247), 2023-08-10
Supplement: s1 [file s1]

**Table S6.** Crude and overlap propensity score weighted odd ratios of dates of Hydrophilic statin prescription for malignant brain tumor.

| Characteristics                         | N of                                         | N of                           | Odd ratios for malignant brain tumor (95% confidence interval) |         |                          |         |
|-----------------------------------------|----------------------------------------------|--------------------------------|----------------------------------------------------------------|---------|--------------------------|---------|
|                                         | Malignant brain tumor<br>(exposure/total, %) | Control<br>(exposure/total, %) | Crude                                                          | P-value | Overlap weighted model † | P-value |
| Age < 55 years old (n= 2,505)           |                                              |                                |                                                                |         |                          |         |
| Normal                                  | 392/501 (78.24)                              | 1,574/2,004 (78.54)            | 1                                                              |         | 1                        |         |
| Dyslipidemia without Hydrophilic statin | 100/501 (19.96)                              | 407/2,004 (20.31)              | 0.99 (0.77-1.26)                                               | 0.914   | 1.07 (0.87-1.32)         | 0.493   |
| Dyslipidemia with < 365 days            | 7/501 (1.4)                                  | 13/2,004 (0.65)                | 2.16 (0.86-5.46)                                               | 0.102   | 2.20 (0.96-5.04)         | 0.062   |
| Dyslipidemia with ≥ 365 days            | 2/501 (0.4)                                  | 10/2,004 (0.5)                 | 0.80 (0.18-3.68)                                               | 0.778   | 1.10 (0.28-4.37)         | 0.892   |
| Age ≥ 55 years old (n= 2,855)           |                                              |                                |                                                                |         |                          |         |
| Normal                                  | 333/571 (58.32)                              | 1,022/2,284 (44.75)            | 1                                                              |         | 1                        |         |
| Dyslipidemia without Hydrophilic statin | 185/571 (32.4)                               | 1,060/2,284 (46.41)            | 0.54 (0.44-0.65)                                               | <0.001* | 0.66 (0.56-0.78)         | <0.001* |
| Dyslipidemia with < 365 days            | 35/571 (6.13)                                | 100/2,284 (4.38)               | 1.07 (0.72-1.61)                                               | 0.729   | 1.41 (0.99-2.01)         | 0.056   |
| Dyslipidemia with ≥ 365 days            | 18/571 (3.15)                                | 102/2,284 (4.47)               | 0.54 (0.32-0.91)                                               | 0.02*   | 0.74 (0.50-1.10)         | 0.139   |
| Male (n= 2,745)                         |                                              |                                |                                                                |         |                          |         |
| Normal                                  | 391/549 (71.22)                              | 1,406/2,196 (64.03)            | 1                                                              |         | 1                        |         |
| Dyslipidemia without Hydrophilic statin | 133/549 (24.23)                              | 689/2,196 (31.38)              | 0.69 (0.56-0.86)                                               | <0.001* | 0.83 (0.70-0.99)         | 0.039*  |
| Dyslipidemia with < 365 days            | 19/549 (3.46)                                | 48/2,196 (2.19)                | 1.42 (0.83-2.45)                                               | 0.203   | 1.67 (1.05-2.67)         | 0.031*  |
| Dyslipidemia with ≥ 365 days            | 6/549 (1.09)                                 | 53/2,196 (2.41)                | 0.41 (0.17-0.95)                                               | 0.039*  | 0.54 (0.31-0.95)         | 0.033*  |

Female (n= 2,615)

|                                         |                 |                     |                  |         |                  |        |
|-----------------------------------------|-----------------|---------------------|------------------|---------|------------------|--------|
| Normal                                  | 334/523 (63.86) | 1,190/2,092 (56.88) | 1                |         | 1                |        |
| Dyslipidemia without Hydrophilic statin | 152/523 (29.06) | 778/2,092 (37.19)   | 0.70 (0.56-0.86) | <0.001* | 0.80 (0.67-0.96) | 0.015* |
| Dyslipidemia with < 365 days            | 23/523 (4.4)    | 65/2,092 (3.11)     | 1.26 (0.77-2.06) | 0.354   | 1.75 (1.13-2.71) | 0.013* |
| Dyslipidemia with ≥ 365 days            | 14/523 (2.68)   | 59/2,092 (2.82)     | 0.85 (0.47-1.53) | 0.58    | 1.51 (0.89-2.56) | 0.129  |

Low income groups (n= 2,520)

|                                         |                 |                    |                  |        |                  |        |
|-----------------------------------------|-----------------|--------------------|------------------|--------|------------------|--------|
| Normal                                  | 349/504 (69.25) | 1,254/2,016 (62.2) | 1                |        | 1                |        |
| Dyslipidemia without Hydrophilic statin | 128/504 (25.4)  | 651/2,016 (32.29)  | 0.71 (0.56-0.88) | 0.002* | 0.94 (0.78-1.13) | 0.511  |
| Dyslipidemia with < 365 days            | 21/504 (4.17)   | 53/2,016 (2.63)    | 1.42 (0.85-2.39) | 0.182  | 1.79 (1.12-2.85) | 0.015* |
| Dyslipidemia with ≥ 365 days            | 6/504 (1.19)    | 58/2,016 (2.88)    | 0.37 (0.16-0.87) | 0.022* | 0.57 (0.33-1.00) | 0.049* |

High income groups (n= 2,840)

|                                         |                 |                     |                  |         |                  |         |
|-----------------------------------------|-----------------|---------------------|------------------|---------|------------------|---------|
| Normal                                  | 376/568 (66.2)  | 1,342/2,272 (59.07) | 1                |         | 1                |         |
| Dyslipidemia without Hydrophilic statin | 157/568 (27.64) | 816/2,272 (35.92)   | 0.69 (0.56-0.84) | <0.001* | 0.73 (0.61-0.87) | <0.001* |
| Dyslipidemia with < 365 days            | 21/568 (3.7)    | 60/2,272 (2.64)     | 1.25 (0.75-2.08) | 0.392   | 1.69 (1.09-2.62) | 0.02*   |
| Dyslipidemia with ≥ 365 days            | 14/568 (2.46)   | 54/2,272 (2.38)     | 0.93 (0.51-1.68) | 0.8     | 1.43 (0.84-2.43) | 0.184   |

Urban residents (n= 2,295)

|                                         |                 |                     |                  |        |                  |       |
|-----------------------------------------|-----------------|---------------------|------------------|--------|------------------|-------|
| Normal                                  | 309/459 (67.32) | 1,101/1,836 (59.97) | 1                |        | 1                |       |
| Dyslipidemia without Hydrophilic statin | 126/459 (27.45) | 643/1,836 (35.02)   | 0.70 (0.56-0.88) | 0.002* | 0.87 (0.72-1.06) | 0.158 |

|                                         |                 |                     |                  |         |                  |         |
|-----------------------------------------|-----------------|---------------------|------------------|---------|------------------|---------|
| Dyslipidemia with < 365 days            | 15/459 (3.27)   | 48/1,836 (2.61)     | 1.11 (0.62-2.02) | 0.722   | 1.71 (1.05-2.78) | 0.03*   |
| Dyslipidemia with ≥ 365 days            | 9/459 (1.96)    | 44/1,836 (2.4)      | 0.73 (0.35-1.51) | 0.394   | 0.98 (0.56-1.71) | 0.935   |
| Rural residents (n= 3,065)              |                 |                     |                  |         |                  |         |
| Normal                                  | 416/613 (67.86) | 1,495/2,452 (60.97) | 1                |         | 1                |         |
| Dyslipidemia without Hydrophilic statin | 159/613 (25.94) | 824/2,452 (33.61)   | 0.69 (0.57-0.85) | <0.001* | 0.79 (0.67-0.93) | 0.005*  |
| Dyslipidemia with < 365 days            | 27/613 (4.4)    | 65/2,452 (2.65)     | 1.49 (0.94-2.37) | 0.089   | 1.80 (1.17-2.75) | 0.007*  |
| Dyslipidemia with ≥ 365 days            | 11/613 (1.79)   | 68/2,452 (2.77)     | 0.58 (0.30-1.11) | 0.1     | 0.87 (0.53-1.44) | 0.585   |
| CCI scores = 0 (n= 3,238)               |                 |                     |                  |         |                  |         |
| Normal                                  | 56/98 (57.14)   | 2,025/3,140 (64.49) | 1                |         | 1                |         |
| Dyslipidemia without Hydrophilic statin | 36/98 (36.73)   | 977/3,140 (31.11)   | 1.33 (0.87-2.04) | 0.186   | 1.82 (1.51-2.18) | <0.001* |
| Dyslipidemia with < 365 days            | 4/98 (4.08)     | 73/3,140 (2.32)     | 1.98 (0.70-5.61) | 0.198   | 2.93 (1.77-4.84) | <0.001* |
| Dyslipidemia with ≥ 365 days            | 2/98 (2.04)     | 65/3,140 (2.07)     | 1.11 (0.27-4.66) | 0.884   | 1.66 (0.91-3.03) | 0.097   |
| CCI scores = 1 (n= 597)                 |                 |                     |                  |         |                  |         |
| Normal                                  | 13/36 (36.11)   | 285/561 (50.8)      | 1                |         | 1                |         |
| Dyslipidemia without Hydrophilic statin | 18/36 (50)      | 234/561 (41.71)     | 1.69 (0.81-3.51) | 0.163   | 2.41 (1.59-3.63) | <0.001* |
| Dyslipidemia with < 365 days            | 3/36 (8.33)     | 18/561 (3.21)       | 3.65 (0.95-14.0) | 0.059   | 6.81 (2.81-16.5) | <0.001* |
| Dyslipidemia with ≥ 365 days            | 2/36 (5.56)     | 24/561 (4.28)       | 1.83 (0.39-8.57) | 0.445   | 2.81 (1.17-6.75) | 0.021*  |
| CCI scores ≥ 2 (n= 1,525)               |                 |                     |                  |         |                  |         |
| Normal                                  | 656/938 (69.94) | 286/587 (48.72)     | 1                |         | 1                |         |

|                                         |                 |                     |                  |         |                  |         |
|-----------------------------------------|-----------------|---------------------|------------------|---------|------------------|---------|
| Dyslipidemia without Hydrophilic statin | 231/938 (24.63) | 256/587 (43.61)     | 0.39 (0.31-0.49) | <0.001* | 0.54 (0.43-0.69) | <0.001* |
| Dyslipidemia with < 365 days            | 35/938 (3.73)   | 22/587 (3.75)       | 0.69 (0.40-1.20) | 0.193   | 1.23 (0.68-2.21) | 0.49    |
| Dyslipidemia with ≥ 365 days            | 16/938 (1.71)   | 23/587 (3.92)       | 0.30 (0.16-0.58) | <0.001* | 0.72 (0.36-1.45) | 0.36    |
| Non-diabetes history (n= 3,984)         |                 |                     |                  |         |                  |         |
| Normal                                  | 599/785 (76.31) | 2,258/3,199 (70.58) | 1                |         | 1                |         |
| Dyslipidemia without Hydrophilic statin | 157/785 (20)    | 840/3,199 (26.26)   | 0.70 (0.58-0.85) | <0.001* | 0.81 (0.70-0.94) | 0.007*  |
| Dyslipidemia with < 365 days            | 19/785 (2.42)   | 52/3,199 (1.63)     | 1.38 (0.81-2.35) | 0.238   | 1.24 (0.80-1.93) | 0.344   |
| Dyslipidemia with ≥ 365 days            | 10/785 (1.27)   | 49/3,199 (1.53)     | 0.77 (0.39-1.53) | 0.454   | 0.58 (0.34-0.98) | 0.042*  |
| Diabetes history (n= 1,376)             |                 |                     |                  |         |                  |         |
| Normal                                  | 126/287 (43.9)  | 338/1,089 (31.04)   | 1                |         | 1                |         |
| Dyslipidemia without Hydrophilic statin | 128/287 (44.6)  | 627/1,089 (57.58)   | 0.55 (0.41-0.72) | <0.001* | 0.76 (0.60-0.96) | 0.023*  |
| Dyslipidemia with < 365 days            | 23/287 (8.01)   | 61/1,089 (5.6)      | 1.01 (0.60-1.70) | 0.966   | 2.00 (1.22-3.29) | 0.006*  |
| Dyslipidemia with ≥ 365 days            | 10/287 (3.48)   | 63/1,089 (5.79)     | 0.43 (0.21-0.86) | 0.016*  | 1.09 (0.61-1.94) | 0.765   |

---

Abbreviations: CCI, Charlson Comorbidity Index;

\* Significance at  $P < 0.05$

† Adjusted for age, sex, income, region of residence, CCI scores and diabetes history
