# Supplementary material for: Association between the Use of Statins and Brain Tumors
Source: MDPI journal article supplement (doi:10.3390/biomedicines11082247), 2023-08-10
Supplement: s1 [file s1]

**Table S1.** Crude and overlap propensity score weighted odd ratios of dates of any statin prescription for any brain tumor.

| Characteristics               | N of<br>Any brain tumor<br>(exposure/total, %) | N of<br>Control<br>(exposure/total, %) | Odd ratios for any brain tumor (95% confidence interval) |         |                          |         |
|-------------------------------|------------------------------------------------|----------------------------------------|----------------------------------------------------------|---------|--------------------------|---------|
|                               |                                                |                                        | Crude                                                    | P-value | Overlap weighted model † | P-value |
| Age < 55 years old (n= 4,485) |                                                |                                        |                                                          |         |                          |         |
| Normal                        | 667/897 (74.36)                                | 2,710/3,588 (75.53)                    | 1                                                        |         | 1                        |         |
| Dyslipidemia without Statin   | 162/897 (18.06)                                | 695/3,588 (19.37)                      | 0.95 (0.78-1.15)                                         | 0.576   | 0.91 (0.78-1.06)         | 0.217   |
| Dyslipidemia with < 365 days  | 43/897 (4.79)                                  | 108/3,588 (3.01)                       | 1.62 (1.12-2.33)                                         | 0.009*  | 1.91 (1.36-2.66)         | <0.001* |
| Dyslipidemia with ≥ 365 days  | 25/897 (2.79)                                  | 75/3,588 (2.09)                        | 1.35 (0.85-2.15)                                         | 0.197   | 1.19 (0.81-1.76)         | 0.376   |
| Age ≥ 55 years old (n= 4,980) |                                                |                                        |                                                          |         |                          |         |
| Normal                        | 493/996 (49.5)                                 | 1,747/3,984 (43.85)                    | 1                                                        |         | 1                        |         |
| Dyslipidemia without Statin   | 187/996 (18.78)                                | 1,165/3,984 (29.24)                    | 0.57 (0.47-0.68)                                         | <0.001* | 0.68 (0.59-0.78)         | <0.001* |
| Dyslipidemia with < 365 days  | 141/996 (14.16)                                | 401/3,984 (10.07)                      | 1.25 (1.00-1.55)                                         | 0.046*  | 1.42 (1.18-1.71)         | <0.001* |
| Dyslipidemia with ≥ 365 days  | 175/996 (17.57)                                | 671/3,984 (16.84)                      | 0.92 (0.76-1.12)                                         | 0.426   | 1.12 (0.96-1.32)         | 0.161   |
| Male (n= 4,275)               |                                                |                                        |                                                          |         |                          |         |
| Normal                        | 565/855 (66.08)                                | 2,175/3,420 (63.6)                     | 1                                                        |         | 1                        |         |
| Dyslipidemia without Statin   | 149/855 (17.43)                                | 796/3,420 (23.27)                      | 0.72 (0.59-0.88)                                         | 0.001*  | 0.83 (0.71-0.97)         | 0.019*  |
| Dyslipidemia with < 365 days  | 70/855 (8.19)                                  | 177/3,420 (5.18)                       | 1.52 (1.14-2.04)                                         | 0.005*  | 1.84 (1.42-2.38)         | <0.001* |
| Dyslipidemia with ≥ 365 days  | 71/855 (8.3)                                   | 272/3,420 (7.95)                       | 1.00 (0.76-1.33)                                         | 0.973   | 1.28 (1.02-1.60)         | 0.032*  |
| Female (n= 5,190)             |                                                |                                        |                                                          |         |                          |         |
| Normal                        | 595/1,038 (57.32)                              | 2,282/4,152 (54.96)                    | 1                                                        |         | 1                        |         |

|                               |                   |                     |                  |         |                  |         |
|-------------------------------|-------------------|---------------------|------------------|---------|------------------|---------|
| Dyslipidemia without Statin   | 200/1,038 (19.27) | 1,064/4,152 (25.63) | 0.72 (0.60-0.86) | <0.001* | 0.79 (0.69-0.91) | 0.001*  |
| Dyslipidemia with < 365 days  | 114/1,038 (10.98) | 332/4,152 (8.00)    | 1.32 (1.05-1.66) | 0.019*  | 1.44 (1.18-1.76) | <0.001* |
| Dyslipidemia with ≥ 365 days  | 129/1,038 (12.43) | 474/4,152 (11.42)   | 1.04 (0.84-1.29) | 0.695   | 1.15 (0.95-1.40) | 0.154   |
| Low income groups (n= 4,260)  |                   |                     |                  |         |                  |         |
| Normal                        | 550/852 (64.55)   | 2,096/3,408 (61.5)  | 1                |         | 1                |         |
| Dyslipidemia without Statin   | 143/852 (16.78)   | 787/3,408 (23.09)   | 0.69 (0.57-0.85) | <0.001* | 0.83 (0.71-0.98) | 0.024*  |
| Dyslipidemia with < 365 days  | 77/852 (9.04)     | 209/3,408 (6.13)    | 1.40 (1.06-1.85) | 0.017*  | 1.73 (1.35-2.23) | <0.001* |
| Dyslipidemia with ≥ 365 days  | 82/852 (9.62)     | 316/3,408 (9.27)    | 0.99 (0.76-1.28) | 0.933   | 1.09 (0.88-1.36) | 0.428   |
| High income groups (n= 5,205) |                   |                     |                  |         |                  |         |
| Normal                        | 610/1,041 (58.6)  | 2,361/4,164 (56.7)  | 1                |         | 1                |         |
| Dyslipidemia without Statin   | 206/1,041 (19.79) | 1,073/4,164 (25.77) | 0.74 (0.62-0.88) | <0.001* | 0.79 (0.69-0.91) | <0.001* |
| Dyslipidemia with < 365 days  | 107/1,041 (10.28) | 300/4,164 (7.2)     | 1.38 (1.09-1.75) | 0.008*  | 1.51 (1.23-1.85) | <0.001* |
| Dyslipidemia with ≥ 365 days  | 118/1,041 (11.34) | 430/4,164 (10.33)   | 1.06 (0.85-1.33) | 0.595   | 1.32 (1.09-1.61) | 0.005*  |
| Urban residents (n= 4,245)    |                   |                     |                  |         |                  |         |
| Normal                        | 506/849 (59.6)    | 1,958/3,396 (57.66) | 1                |         | 1                |         |
| Dyslipidemia without Statin   | 171/849 (20.14)   | 857/3,396 (25.24)   | 0.77 (0.64-0.93) | 0.008*  | 0.88 (0.75-1.03) | 0.105   |
| Dyslipidemia with < 365 days  | 78/849 (9.19)     | 231/3,396 (6.8)     | 1.31 (0.99-1.72) | 0.056   | 1.63 (1.28-2.07) | <0.001* |
| Dyslipidemia with ≥ 365 days  | 94/849 (11.07)    | 350/3,396 (10.31)   | 1.04 (0.81-1.33) | 0.761   | 1.16 (0.94-1.45) | 0.172   |
| Rural residents (n= 5,220)    |                   |                     |                  |         |                  |         |
| Normal                        | 654/1,044 (62.64) | 2,499/4,176 (59.84) | 1                |         | 1                |         |

|                                 |                   |                     |                  |         |                  |         |
|---------------------------------|-------------------|---------------------|------------------|---------|------------------|---------|
| Dyslipidemia without Statin     | 178/1,044 (17.05) | 1,003/4,176 (24.02) | 0.68 (0.57-0.81) | <0.001* | 0.74 (0.64-0.86) | <0.001* |
| Dyslipidemia with < 365 days    | 106/1,044 (10.15) | 278/4,176 (6.66)    | 1.46 (1.15-1.85) | 0.002*  | 1.56 (1.27-1.93) | <0.001* |
| Dyslipidemia with ≥ 365 days    | 106/1,044 (10.15) | 396/4,176 (9.48)    | 1.02 (0.81-1.29) | 0.848   | 1.28 (1.05-1.56) | 0.015*  |
| CCI scores = 0 (n= 6,141)       |                   |                     |                  |         |                  |         |
| Normal                          | 325/558 (58.24)   | 3,495/5,583 (62.6)  | 1                |         | 1                |         |
| Dyslipidemia without Statin     | 127/558 (22.76)   | 1,294/5,583 (23.18) | 1.06 (0.85-1.31) | 0.622   | 1.04 (0.91-1.19) | 0.552   |
| Dyslipidemia with < 365 days    | 54/558 (9.68)     | 342/5,583 (6.13)    | 1.70 (1.25-2.31) | <0.001* | 1.70 (1.38-2.10) | <0.001* |
| Dyslipidemia with ≥ 365 days    | 52/558 (9.32)     | 452/5,583 (8.1)     | 1.24 (0.91-1.68) | 0.177   | 1.30 (1.05-1.60) | 0.015*  |
| CCI scores = 1 (n= 1,147)       |                   |                     |                  |         |                  |         |
| Normal                          | 63/149 (42.28)    | 487/998 (48.8)      | 1                |         | 1                |         |
| Dyslipidemia without Statin     | 33/149 (22.15)    | 280/998 (28.06)     | 0.91 (0.58-1.42) | 0.682   | 0.94 (0.70-1.27) | 0.699   |
| Dyslipidemia with < 365 days    | 27/149 (18.12)    | 89/998 (8.92)       | 2.35 (1.42-3.88) | <0.001* | 2.89 (1.94-4.31) | <0.001* |
| Dyslipidemia with ≥ 365 days    | 26/149 (17.45)    | 142/998 (14.23)     | 1.42 (0.86-2.32) | 0.168   | 1.98 (1.34-2.92) | <0.001* |
| CCI scores ≥ 2 (n= 2,177)       |                   |                     |                  |         |                  |         |
| Normal                          | 772/1,186 (65.09) | 475/991 (47.93)     | 1                |         | 1                |         |
| Dyslipidemia without Statin     | 189/1,186 (15.94) | 286/991 (28.86)     | 0.41 (0.33-0.50) | <0.001* | 0.50 (0.40-0.63) | <0.001* |
| Dyslipidemia with < 365 days    | 103/1,186 (8.68)  | 78/991 (7.87)       | 0.81 (0.59-1.11) | 0.197   | 1.20 (0.87-1.67) | 0.272   |
| Dyslipidemia with ≥ 365 days    | 122/1,186 (10.29) | 152/991 (15.34)     | 0.49 (0.38-0.64) | <0.001* | 0.99 (0.75-1.31) | 0.938   |
| Non-diabetes history (n= 7,041) |                   |                     |                  |         |                  |         |
| Normal                          | 971/1,367 (71.03) | 3,897/5,674 (68.68) | 1                |         | 1                |         |

|                              |                   |                     |                  |         |                  |         |
|------------------------------|-------------------|---------------------|------------------|---------|------------------|---------|
| Dyslipidemia without Statin  | 215/1,367 (15.73) | 1,187/5,674 (20.92) | 0.73 (0.62-0.85) | <0.001* | 0.83 (0.73-0.94) | 0.003*  |
| Dyslipidemia with < 365 days | 94/1,367 (6.88)   | 281/5,674 (4.95)    | 1.34 (1.05-1.71) | 0.018*  | 1.49 (1.21-1.84) | <0.001* |
| Dyslipidemia with ≥ 365 days | 87/1,367 (6.36)   | 309/5,674 (5.45)    | 1.13 (0.88-1.45) | 0.334   | 1.25 (1.02-1.53) | 0.034*  |
| Diabetes history (n= 2,424)  |                   |                     |                  |         |                  |         |
| Normal                       | 189/526 (35.93)   | 560/1,898 (29.5)    | 1                |         | 1                |         |
| Dyslipidemia without Statin  | 134/526 (25.48)   | 673/1,898 (35.46)   | 0.59 (0.46-0.76) | <0.001* | 0.72 (0.59-0.88) | 0.002*  |
| Dyslipidemia with < 365 days | 90/526 (17.11)    | 228/1,898 (12.01)   | 1.17 (0.87-1.57) | 0.297   | 1.60 (1.23-2.07) | <0.001* |
| Dyslipidemia with ≥ 365 days | 113/526 (21.48)   | 437/1,898 (23.02)   | 0.77 (0.59-1.00) | 0.048*  | 1.09 (0.87-1.37) | 0.469   |

---

Abbreviations: CCI, Charlson Comorbidity Index;

\* Significance at  $P < 0.05$

† Adjusted for age, sex, income, region of residence, CCI scores and diabetes history.
