# Supplementary material for: Association between the Use of Statins and Brain Tumors
Source: MDPI journal article supplement (doi:10.3390/biomedicines11082247), 2023-08-10
Supplement: s1 [file s1]

**Table S5.** Crude and overlap propensity score weighted odd ratios of dates of Lipophilic statin prescription for malignant brain tumor.

| Characteristics                        | N of                                         | N of                           | Odd ratios for malignant brain tumor (95% confidence interval) |         |                          |         |
|----------------------------------------|----------------------------------------------|--------------------------------|----------------------------------------------------------------|---------|--------------------------|---------|
|                                        | Malignant brain tumor<br>(exposure/total, %) | Control<br>(exposure/total, %) | Crude                                                          | P-value | Overlap weighted model † | P-value |
| Age < 55 years old (n= 2,505)          |                                              |                                |                                                                |         |                          |         |
| Normal                                 | 392/501 (78.24)                              | 1,574/2,004 (78.54)            | 1                                                              |         | 1                        |         |
| Dyslipidemia without Lipophilic statin | 82/501 (16.37)                               | 361/2,004 (18.01)              | 0.91 (0.70-1.19)                                               | 0.494   | 0.99 (0.79-1.22)         | 0.895   |
| Dyslipidemia with < 365 days           | 17/501 (3.39)                                | 46/2,004 (2.3)                 | 1.48 (0.84-2.62)                                               | 0.173   | 2.91 (1.66-5.09)         | <0.001* |
| Dyslipidemia with ≥ 365 days           | 10/501 (2)                                   | 23/2,004 (1.15)                | 1.75 (0.82-3.70)                                               | 0.146   | 1.12 (0.61-2.07)         | 0.713   |
| Age ≥ 55 years old (n= 2,855)          |                                              |                                |                                                                |         |                          |         |
| Normal                                 | 333/571 (58.32)                              | 1,022/2,284 (44.75)            | 1                                                              |         | 1                        |         |
| Dyslipidemia without Lipophilic statin | 107/571 (18.74)                              | 789/2,284 (34.54)              | 0.42 (0.33-0.53)                                               | <0.001* | 0.50 (0.42-0.60)         | <0.001* |
| Dyslipidemia with < 365 days           | 66/571 (11.56)                               | 207/2,284 (9.06)               | 0.98 (0.72-1.33)                                               | 0.889   | 1.29 (1.00-1.68)         | 0.05    |
| Dyslipidemia with ≥ 365 days           | 65/571 (11.38)                               | 266/2,284 (11.65)              | 0.75 (0.56-1.01)                                               | 0.058   | 0.94 (0.74-1.19)         | 0.605   |
| Male (n= 2,745)                        |                                              |                                |                                                                |         |                          |         |
| Normal                                 | 391/549 (71.22)                              | 1,406/2,196 (64.03)            | 1                                                              |         | 1                        |         |
| Dyslipidemia without Lipophilic statin | 94/549 (17.12)                               | 576/2,196 (26.23)              | 0.59 (0.46-0.75)                                               | <0.001* | 0.67 (0.55-0.81)         | <0.001* |
| Dyslipidemia with < 365 days           | 37/549 (6.74)                                | 99/2,196 (4.51)                | 1.34 (0.91-1.99)                                               | 0.141   | 1.98 (1.40-2.80)         | <0.001* |
| Dyslipidemia with ≥ 365 days           | 27/549 (4.92)                                | 115/2,196 (5.24)               | 0.84 (0.55-1.30)                                               | 0.444   | 1.06 (0.77-1.45)         | 0.731   |

Female (n= 2,615)

|                                        |                 |                     |                  |         |                  |         |
|----------------------------------------|-----------------|---------------------|------------------|---------|------------------|---------|
| Normal                                 | 334/523 (63.86) | 1,190/2,092 (56.88) | 1                |         | 1                |         |
| Dyslipidemia without Lipophilic statin | 95/523 (18.16)  | 574/2,092 (27.44)   | 0.59 (0.46-0.76) | <0.001* | 0.71 (0.58-0.87) | <0.001* |
| Dyslipidemia with < 365 days           | 46/523 (8.8)    | 154/2,092 (7.36)    | 1.06 (0.75-1.51) | 0.728   | 1.44 (1.06-1.96) | 0.02*   |
| Dyslipidemia with ≥ 365 days           | 48/523 (9.18)   | 174/2,092 (8.32)    | 0.98 (0.70-1.38) | 0.921   | 1.07 (0.80-1.44) | 0.636   |

Low income groups (n= 2,520)

|                                        |                 |                    |                  |         |                  |         |
|----------------------------------------|-----------------|--------------------|------------------|---------|------------------|---------|
| Normal                                 | 349/504 (69.25) | 1,254/2,016 (62.2) | 1                |         | 1                |         |
| Dyslipidemia without Lipophilic statin | 77/504 (15.28)  | 529/2,016 (26.24)  | 0.52 (0.40-0.68) | <0.001* | 0.72 (0.59-0.88) | 0.002*  |
| Dyslipidemia with < 365 days           | 44/504 (8.73)   | 104/2,016 (5.16)   | 1.52 (1.05-2.20) | 0.027*  | 2.52 (1.76-3.60) | <0.001* |
| Dyslipidemia with ≥ 365 days           | 34/504 (6.75)   | 129/2,016 (6.4)    | 0.95 (0.64-1.41) | 0.788   | 1.10 (0.81-1.49) | 0.546   |

High income groups (n= 2,840)

|                                        |                 |                     |                  |         |                  |         |
|----------------------------------------|-----------------|---------------------|------------------|---------|------------------|---------|
| Normal                                 | 376/568 (66.2)  | 1,342/2,272 (59.07) | 1                |         | 1                |         |
| Dyslipidemia without Lipophilic statin | 112/568 (19.72) | 621/2,272 (27.33)   | 0.64 (0.51-0.81) | <0.001* | 0.66 (0.55-0.80) | <0.001* |
| Dyslipidemia with < 365 days           | 39/568 (6.87)   | 149/2,272 (6.56)    | 0.93 (0.64-1.35) | 0.719   | 1.25 (0.92-1.69) | 0.15    |
| Dyslipidemia with ≥ 365 days           | 41/568 (7.22)   | 160/2,272 (7.04)    | 0.91 (0.64-1.31) | 0.628   | 1.10 (0.81-1.48) | 0.552   |

Urban residents (n= 2,295)

|                                        |                 |                     |                  |         |                  |        |
|----------------------------------------|-----------------|---------------------|------------------|---------|------------------|--------|
| Normal                                 | 309/459 (67.32) | 1,101/1,836 (59.97) | 1                |         | 1                |        |
| Dyslipidemia without Lipophilic statin | 82/459 (17.86)  | 491/1,836 (26.74)   | 0.60 (0.46-0.78) | <0.001* | 0.74 (0.60-0.92) | 0.005* |

|                                        |                 |                     |                  |         |                  |         |
|----------------------------------------|-----------------|---------------------|------------------|---------|------------------|---------|
| Dyslipidemia with < 365 days           | 37/459 (8.06)   | 104/1,836 (5.66)    | 1.27 (0.85-1.88) | 0.24    | 2.55 (1.76-3.68) | <0.001* |
| Dyslipidemia with ≥ 365 days           | 31/459 (6.75)   | 140/1,836 (7.63)    | 0.79 (0.52-1.19) | 0.256   | 0.77 (0.55-1.07) | 0.122   |
| Rural residents (n= 3,065)             |                 |                     |                  |         |                  |         |
| Normal                                 | 416/613 (67.86) | 1,495/2,452 (60.97) | 1                |         | 1                |         |
| Dyslipidemia without Lipophilic statin | 107/613 (17.46) | 659/2,452 (26.88)   | 0.58 (0.46-0.74) | <0.001* | 0.65 (0.54-0.78) | <0.001* |
| Dyslipidemia with < 365 days           | 46/613 (7.5)    | 149/2,452 (6.08)    | 1.11 (0.78-1.57) | 0.558   | 1.29 (0.95-1.73) | 0.099   |
| Dyslipidemia with ≥ 365 days           | 44/613 (7.18)   | 149/2,452 (6.08)    | 1.06 (0.75-1.51) | 0.742   | 1.44 (1.08-1.92) | 0.012*  |
| CCI scores = 0 (n= 3,238)              |                 |                     |                  |         |                  |         |
| Normal                                 | 56/98 (57.14)   | 2,025/3,140 (64.49) | 1                |         | 1                |         |
| Dyslipidemia without Lipophilic statin | 22/98 (22.45)   | 788/3,140 (25.1)    | 1.01 (0.61-1.66) | 0.97    | 1.40 (1.15-1.72) | <0.001* |
| Dyslipidemia with < 365 days           | 16/98 (16.33)   | 161/3,140 (5.13)    | 3.59 (2.02-6.41) | <0.001* | 5.45 (3.97-7.46) | <0.001* |
| Dyslipidemia with ≥ 365 days           | 4/98 (4.08)     | 166/3,140 (5.29)    | 0.87 (0.31-2.43) | 0.793   | 1.49 (0.97-2.29) | 0.066   |
| CCI scores = 1 (n= 597)                |                 |                     |                  |         |                  |         |
| Normal                                 | 13/36 (36.11)   | 285/561 (50.8)      | 1                |         | 1                |         |
| Dyslipidemia without Lipophilic statin | 10/36 (27.78)   | 166/561 (29.59)     | 1.32 (0.57-3.08) | 0.519   | 1.85 (1.18-2.89) | 0.007*  |
| Dyslipidemia with < 365 days           | 5/36 (13.89)    | 55/561 (9.8)        | 1.99 (0.68-5.82) | 0.207   | 3.53 (1.86-6.67) | <0.001* |
| Dyslipidemia with ≥ 365 days           | 8/36 (22.22)    | 55/561 (9.8)        | 3.19 (1.26-8.06) | 0.014*  | 6.10 (3.28-11.4) | <0.001* |
| CCI scores ≥ 2 (n= 1,525)              |                 |                     |                  |         |                  |         |
| Normal                                 | 656/938 (69.94) | 286/587 (48.72)     | 1                |         | 1                |         |

|                                        |                 |                     |                  |         |                  |         |
|----------------------------------------|-----------------|---------------------|------------------|---------|------------------|---------|
| Dyslipidemia without Lipophilic statin | 157/938 (16.74) | 196/587 (33.39)     | 0.35 (0.27-0.45) | <0.001* | 0.46 (0.35-0.60) | <0.001* |
| Dyslipidemia with < 365 days           | 62/938 (6.61)   | 37/587 (6.3)        | 0.73 (0.48-1.12) | 0.153   | 1.13 (0.71-1.78) | 0.608   |
| Dyslipidemia with ≥ 365 days           | 63/938 (6.72)   | 68/587 (11.58)      | 0.40 (0.28-0.58) | <0.001* | 0.77 (0.53-1.12) | 0.175   |
| Non-diabetes history (n= 3,984)        |                 |                     |                  |         |                  |         |
| Normal                                 | 599/785 (76.31) | 2,258/3,199 (70.58) | 1                |         | 1                |         |
| Dyslipidemia without Lipophilic statin | 108/785 (13.76) | 690/3,199 (21.57)   | 0.59 (0.47-0.74) | <0.001* | 0.65 (0.55-0.77) | <0.001* |
| Dyslipidemia with < 365 days           | 46/785 (5.86)   | 130/3,199 (4.06)    | 1.33 (0.94-1.89) | 0.105   | 1.78 (1.31-2.42) | <0.001* |
| Dyslipidemia with ≥ 365 days           | 32/785 (4.08)   | 121/3,199 (3.78)    | 1.00 (0.67-1.49) | 0.988   | 0.98 (0.73-1.32) | 0.907   |
| Diabetes history (n= 1,376)            |                 |                     |                  |         |                  |         |
| Normal                                 | 126/287 (43.9)  | 338/1,089 (31.04)   | 1                |         | 1                |         |
| Dyslipidemia without Lipophilic statin | 81/287 (28.22)  | 460/1,089 (42.24)   | 0.47 (0.35-0.65) | <0.001* | 0.67 (0.52-0.87) | 0.002*  |
| Dyslipidemia with < 365 days           | 37/287 (12.89)  | 123/1,089 (11.29)   | 0.81 (0.53-1.23) | 0.318   | 1.32 (0.91-1.92) | 0.138   |
| Dyslipidemia with ≥ 365 days           | 43/287 (14.98)  | 168/1,089 (15.43)   | 0.69 (0.46-1.02) | 0.06    | 1.08 (0.77-1.50) | 0.66    |

---

Abbreviations: CCI, Charlson Comorbidity Index;

\* Significance at  $P < 0.05$

† Adjusted for age, sex, income, region of residence, CCI scores and diabetes history
