# Supplementary material for: Association between the Use of Statins and Brain Tumors
Source: MDPI journal article supplement (doi:10.3390/biomedicines11082247), 2023-08-10
Supplement: s1 [file s1]

**Table S3.** Crude and overlap propensity score weighted odd ratios of dates of Hydrophilic statin prescription for any brain tumor.

| Characteristics                         | N of<br>Any brain tumor<br>(exposure/total, %) | N of<br>Control<br>(exposure/total, %) | Odd ratios for any brain tumor (95% confidence interval) |         |                          |         |
|-----------------------------------------|------------------------------------------------|----------------------------------------|----------------------------------------------------------|---------|--------------------------|---------|
|                                         |                                                |                                        | Crude                                                    | P-value | Overlap weighted model † | P-value |
| Age < 55 years old (n= 4,485)           |                                                |                                        |                                                          |         |                          |         |
| Normal                                  | 667/897 (74.36)                                | 2,710/3,588 (75.53)                    | 1                                                        |         | 1                        |         |
| Dyslipidemia without Hydrophilic statin | 205/897 (22.85)                                | 826/3,588 (23.02)                      | 1.01 (0.85-1.20)                                         | 0.926   | 0.96 (0.83-1.11)         | 0.613   |
| Dyslipidemia with < 365 days            | 22/897 (2.45)                                  | 28/3,588 (0.78)                        | 3.19 (1.81-5.62)                                         | <0.001* | 3.49 (1.99-6.13)         | <0.001* |
| Dyslipidemia with ≥ 365 days            | 3/897 (0.33)                                   | 24/3,588 (0.67)                        | 0.51 (0.15-1.69)                                         | 0.27    | 0.47 (0.18-1.23)         | 0.123   |
| Age ≥ 55 years old (n= 4,980)           |                                                |                                        |                                                          |         |                          |         |
| Normal                                  | 493/996 (49.5)                                 | 1,747/3,984 (43.85)                    | 1                                                        |         | 1                        |         |
| Dyslipidemia without Hydrophilic statin | 402/996 (40.36)                                | 1,872/3,984 (46.99)                    | 0.76 (0.66-0.88)                                         | <0.001* | 0.89 (0.79-1.01)         | 0.075   |
| Dyslipidemia with < 365 days            | 63/996 (6.33)                                  | 194/3,984 (4.87)                       | 1.15 (0.85-1.56)                                         | 0.361   | 1.31 (1.02-1.68)         | 0.033*  |
| Dyslipidemia with ≥ 365 days            | 38/996 (3.82)                                  | 171/3,984 (4.29)                       | 0.79 (0.55-1.13)                                         | 0.2     | 1.00 (0.75-1.34)         | 0.984   |
| Male (n= 4,275)                         |                                                |                                        |                                                          |         |                          |         |
| Normal                                  | 565/855 (66.08)                                | 2,175/3,420 (63.6)                     | 1                                                        |         | 1                        |         |
| Dyslipidemia without Hydrophilic statin | 240/855 (28.07)                                | 1,085/3,420 (31.73)                    | 0.85 (0.72-1.01)                                         | 0.06    | 0.99 (0.86-1.14)         | 0.85    |
| Dyslipidemia with < 365 days            | 35/855 (4.09)                                  | 76/3,420 (2.22)                        | 1.77 (1.18-2.67)                                         | 0.006*  | 2.19 (1.52-3.18)         | <0.001* |
| Dyslipidemia with ≥ 365 days            | 15/855 (1.75)                                  | 84/3,420 (2.46)                        | 0.69 (0.39-1.20)                                         | 0.187   | 0.89 (0.59-1.34)         | 0.588   |

Female (n= 5,190)

|                                         |                   |                     |                  |       |                  |        |
|-----------------------------------------|-------------------|---------------------|------------------|-------|------------------|--------|
| Normal                                  | 595/1,038 (57.32) | 2,282/4,152 (54.96) | 1                |       | 1                |        |
| Dyslipidemia without Hydrophilic statin | 367/1,038 (35.36) | 1,613/4,152 (38.85) | 0.87 (0.75-1.01) | 0.065 | 0.94 (0.83-1.06) | 0.296  |
| Dyslipidemia with < 365 days            | 50/1,038 (4.82)   | 146/4,152 (3.52)    | 1.31 (0.94-1.83) | 0.109 | 1.34 (1.01-1.78) | 0.042* |
| Dyslipidemia with ≥ 365 days            | 26/1,038 (2.5)    | 111/4,152 (2.67)    | 0.90 (0.58-1.39) | 0.63  | 1.09 (0.75-1.57) | 0.658  |

Low income groups (n= 4,260)

|                                         |                 |                    |                  |        |                  |         |
|-----------------------------------------|-----------------|--------------------|------------------|--------|------------------|---------|
| Normal                                  | 550/852 (64.55) | 2,096/3,408 (61.5) | 1                |        | 1                |         |
| Dyslipidemia without Hydrophilic statin | 250/852 (29.34) | 1,128/3,408 (33.1) | 0.84 (0.72-1.00) | 0.046* | 0.98 (0.85-1.13) | 0.806   |
| Dyslipidemia with < 365 days            | 40/852 (4.69)   | 93/3,408 (2.73)    | 1.64 (1.12-2.40) | 0.011* | 1.81 (1.29-2.55) | <0.001* |
| Dyslipidemia with ≥ 365 days            | 12/852 (1.41)   | 91/3,408 (2.67)    | 0.50 (0.27-0.92) | 0.027* | 0.60 (0.38-0.93) | 0.021*  |

High income groups (n= 5,205)

|                                         |                   |                    |                  |       |                  |        |
|-----------------------------------------|-------------------|--------------------|------------------|-------|------------------|--------|
| Normal                                  | 610/1,041 (58.6)  | 2,361/4,164 (56.7) | 1                |       | 1                |        |
| Dyslipidemia without Hydrophilic statin | 357/1,041 (34.29) | 1,570/4,164 (37.7) | 0.88 (0.76-1.02) | 0.085 | 0.94 (0.83-1.07) | 0.355  |
| Dyslipidemia with < 365 days            | 45/1,041 (4.32)   | 129/4,164 (3.1)    | 1.35 (0.95-1.92) | 0.093 | 1.50 (1.12-2.02) | 0.007* |
| Dyslipidemia with ≥ 365 days            | 29/1,041 (2.79)   | 104/4,164 (2.5)    | 1.08 (0.71-1.64) | 0.723 | 1.40 (0.98-2.00) | 0.066  |

Urban residents (n= 4,245)

|                                         |                 |                     |                  |       |                  |       |
|-----------------------------------------|-----------------|---------------------|------------------|-------|------------------|-------|
| Normal                                  | 506/849 (59.6)  | 1,958/3,396 (57.66) | 1                |       | 1                |       |
| Dyslipidemia without Hydrophilic statin | 289/849 (34.04) | 1,243/3,396 (36.6)  | 0.90 (0.77-1.06) | 0.198 | 1.01 (0.88-1.16) | 0.863 |

|                                         |                   |                     |                  |         |                  |         |
|-----------------------------------------|-------------------|---------------------|------------------|---------|------------------|---------|
| Dyslipidemia with < 365 days            | 35/849 (4.12)     | 106/3,396 (3.12)    | 1.28 (0.86-1.90) | 0.223   | 1.48 (1.07-2.06) | 0.019*  |
| Dyslipidemia with ≥ 365 days            | 19/849 (2.24)     | 89/3,396 (2.62)     | 0.83 (0.50-1.37) | 0.458   | 0.98 (0.66-1.46) | 0.924   |
| Rural residents (n= 5,220)              |                   |                     |                  |         |                  |         |
| Normal                                  | 654/1,044 (62.64) | 2,499/4,176 (59.84) | 1                |         | 1                |         |
| Dyslipidemia without Hydrophilic statin | 318/1,044 (30.46) | 1,455/4,176 (34.84) | 0.84 (0.72-0.97) | 0.018*  | 0.91 (0.81-1.04) | 0.163   |
| Dyslipidemia with < 365 days            | 50/1,044 (4.79)   | 116/4,176 (2.78)    | 1.65 (1.17-2.32) | 0.004*  | 1.79 (1.32-2.42) | <0.001* |
| Dyslipidemia with ≥ 365 days            | 22/1,044 (2.11)   | 106/4,176 (2.54)    | 0.79 (0.50-1.27) | 0.331   | 1.04 (0.72-1.50) | 0.846   |
| CCI scores = 0 (n= 6,141)               |                   |                     |                  |         |                  |         |
| Normal                                  | 325/558 (58.24)   | 3,495/5,583 (62.6)  | 1                |         | 1                |         |
| Dyslipidemia without Hydrophilic statin | 198/558 (35.48)   | 1,824/5,583 (32.67) | 1.17 (0.97-1.41) | 0.102   | 1.15 (1.02-1.30) | 0.027*  |
| Dyslipidemia with < 365 days            | 20/558 (3.58)     | 146/5,583 (2.62)    | 1.47 (0.91-2.38) | 0.114   | 1.53 (1.12-2.11) | 0.008*  |
| Dyslipidemia with ≥ 365 days            | 15/558 (2.69)     | 118/5,583 (2.11)    | 1.37 (0.79-2.37) | 0.264   | 1.41 (0.99-2.03) | 0.06    |
| CCI scores = 1 (n= 1,147)               |                   |                     |                  |         |                  |         |
| Normal                                  | 63/149 (42.28)    | 487/998 (48.8)      | 1                |         | 1                |         |
| Dyslipidemia without Hydrophilic statin | 66/149 (44.3)     | 439/998 (43.99)     | 1.16 (0.80-1.68) | 0.424   | 1.28 (0.98-1.66) | 0.072   |
| Dyslipidemia with < 365 days            | 17/149 (11.41)    | 29/998 (2.91)       | 4.53 (2.36-8.71) | <0.001* | 5.70 (3.17-10.3) | <0.001* |
| Dyslipidemia with ≥ 365 days            | 3/149 (2.01)      | 43/998 (4.31)       | 0.54 (0.16-1.79) | 0.313   | 0.66 (0.31-1.41) | 0.284   |
| CCI scores ≥ 2 (n= 2,177)               |                   |                     |                  |         |                  |         |
| Normal                                  | 772/1,186 (65.09) | 475/991 (47.93)     | 1                |         | 1                |         |

|                                         |                   |                     |                  |         |                  |         |
|-----------------------------------------|-------------------|---------------------|------------------|---------|------------------|---------|
| Dyslipidemia without Hydrophilic statin | 343/1,186 (28.92) | 435/991 (43.9)      | 0.49 (0.40-0.58) | <0.001* | 0.68 (0.56-0.82) | <0.001* |
| Dyslipidemia with < 365 days            | 48/1,186 (4.05)   | 47/991 (4.74)       | 0.63 (0.41-0.95) | 0.029*  | 1.06 (0.68-1.64) | 0.803   |
| Dyslipidemia with ≥ 365 days            | 23/1,186 (1.94)   | 34/991 (3.43)       | 0.42 (0.24-0.72) | 0.002*  | 0.86 (0.49-1.50) | 0.589   |
| Non-diabetes history (n= 7,041)         |                   |                     |                  |         |                  |         |
| Normal                                  | 971/1,367 (71.03) | 3,897/5,674 (68.68) | 1                |         | 1                |         |
| Dyslipidemia without Hydrophilic statin | 333/1,367 (24.36) | 1,575/5,674 (27.76) | 0.85 (0.74-0.97) | 0.019*  | 0.96 (0.86-1.07) | 0.457   |
| Dyslipidemia with < 365 days            | 41/1,367 (3)      | 118/5,674 (2.08)    | 1.40 (0.97-2.00) | 0.072   | 1.45 (1.07-1.96) | 0.015*  |
| Dyslipidemia with ≥ 365 days            | 22/1,367 (1.61)   | 84/5,674 (1.48)     | 1.05 (0.65-1.69) | 0.837   | 1.02 (0.70-1.49) | 0.904   |
| Diabetes history (n= 2,424)             |                   |                     |                  |         |                  |         |
| Normal                                  | 189/526 (35.93)   | 560/1,898 (29.5)    | 1                |         | 1                |         |
| Dyslipidemia without Hydrophilic statin | 274/526 (52.09)   | 1,123/1,898 (59.17) | 0.72 (0.59-0.89) | 0.003*  | 0.92 (0.77-1.10) | 0.341   |
| Dyslipidemia with < 365 days            | 44/526 (8.37)     | 104/1,898 (5.48)    | 1.25 (0.85-1.85) | 0.255   | 1.76 (1.24-2.49) | 0.001*  |
| Dyslipidemia with ≥ 365 days            | 19/526 (3.61)     | 111/1,898 (5.85)    | 0.51 (0.30-0.85) | 0.01*   | 0.88 (0.59-1.33) | 0.549   |

---

Abbreviations: CCI, Charlson Comorbidity Index;

\* Significance at  $P < 0.05$

† Adjusted for age, sex, income, region of residence, CCI scores and diabetes history
