# Supplementary material for: Association between the Use of Statins and Brain Tumors
Source: MDPI journal article supplement (doi:10.3390/biomedicines11082247), 2023-08-10
Supplement: s1 [file s1]

**S9 table** Crude and overlap propensity score weighted odd ratios of dates of Hydrophilic statin prescription for benign brain tumor

| Characteristics                         | N of                                      | N of                           | Odd ratios for benign brain tumor (95% confidence interval) |         |                          |         |
|-----------------------------------------|-------------------------------------------|--------------------------------|-------------------------------------------------------------|---------|--------------------------|---------|
|                                         | Benign brain tumor<br>(exposure/total, %) | Control<br>(exposure/total, %) | Crude                                                       | P-value | Overlap weighted model † | P-value |
| Age < 55 years old (n= 1,980)           |                                           |                                |                                                             |         |                          |         |
| Normal                                  | 275/396 (69.44)                           | 1,136/1,584 (71.72)            | 1                                                           |         | 1                        |         |
| Dyslipidemia without Hydrophilic statin | 105/396 (26.52)                           | 419/1,584 (26.45)              | 1.04 (0.81-1.33)                                            | 0.787   | 0.97 (0.78-1.20)         | 0.757   |
| Dyslipidemia with < 365 days            | 15/396 (3.79)                             | 15/1,584 (0.95)                | 4.13 (2.00-8.55)                                            | <0.001* | 3.93 (1.86-8.32)         | <0.001* |
| Dyslipidemia with ≥ 365 days            | 1/396 (0.25)                              | 14/1,584 (0.88)                | 0.30 (0.04-2.25)                                            | 0.24    | 0.28 (0.06-1.19)         | 0.085   |
| Age ≥ 55 years old (n= 2,125)           |                                           |                                |                                                             |         |                          |         |
| Normal                                  | 160/425 (37.65)                           | 725/1,700 (42.65)              | 1                                                           |         | 1                        |         |
| Dyslipidemia without Hydrophilic statin | 217/425 (51.06)                           | 812/1,700 (47.76)              | 1.21 (0.96-1.52)                                            | 0.099   | 1.20 (1.00-1.45)         | 0.055   |
| Dyslipidemia with < 365 days            | 28/425 (6.59)                             | 94/1,700 (5.53)                | 1.35 (0.86-2.13)                                            | 0.197   | 1.32 (0.91-1.90)         | 0.146   |
| Dyslipidemia with ≥ 365 days            | 20/425 (4.71)                             | 69/1,700 (4.06)                | 1.31 (0.78-2.22)                                            | 0.31    | 1.35 (0.88-2.08)         | 0.168   |
| Male (n= 1,530)                         |                                           |                                |                                                             |         |                          |         |
| Normal                                  | 174/306 (56.86)                           | 769/1,224 (62.83)              | 1                                                           |         | 1                        |         |
| Dyslipidemia without Hydrophilic statin | 107/306 (34.97)                           | 396/1,224 (32.35)              | 1.19 (0.91-1.56)                                            | 0.197   | 1.31 (1.03-1.66)         | 0.029*  |
| Dyslipidemia with < 365 days            | 16/306 (5.23)                             | 28/1,224 (2.29)                | 2.53 (1.34-4.77)                                            | 0.004*  | 2.97 (1.63-5.41)         | <0.001* |
| Dyslipidemia with ≥ 365 days            | 9/306 (2.94)                              | 31/1,224 (2.53)                | 1.28 (0.60-2.74)                                            | 0.52    | 1.44 (0.77-2.71)         | 0.253   |

Female (n= 2,575)

|                                         |                 |                     |                  |       |                  |       |
|-----------------------------------------|-----------------|---------------------|------------------|-------|------------------|-------|
| Normal                                  | 261/515 (50.68) | 1,092/2,060 (53.01) | 1                |       | 1                |       |
| Dyslipidemia without Hydrophilic statin | 215/515 (41.75) | 835/2,060 (40.53)   | 1.08 (0.88-1.32) | 0.47  | 1.03 (0.86-1.22) | 0.746 |
| Dyslipidemia with < 365 days            | 27/515 (5.24)   | 81/2,060 (3.93)     | 1.39 (0.88-2.20) | 0.153 | 1.27 (0.86-1.86) | 0.228 |
| Dyslipidemia with ≥ 365 days            | 12/515 (2.33)   | 52/2,060 (2.52)     | 0.97 (0.51-1.83) | 0.915 | 0.97 (0.58-1.63) | 0.915 |

Low income groups (n= 1,740)

|                                         |                 |                   |                  |        |                  |        |
|-----------------------------------------|-----------------|-------------------|------------------|--------|------------------|--------|
| Normal                                  | 201/348 (57.76) | 842/1,392 (60.49) | 1                |        | 1                |        |
| Dyslipidemia without Hydrophilic statin | 122/348 (35.06) | 477/1,392 (34.27) | 1.07 (0.83-1.38) | 0.591  | 1.04 (0.83-1.30) | 0.748  |
| Dyslipidemia with < 365 days            | 19/348 (5.46)   | 40/1,392 (2.87)   | 1.99 (1.13-3.51) | 0.017* | 1.88 (1.13-3.13) | 0.015* |
| Dyslipidemia with ≥ 365 days            | 6/348 (1.72)    | 33/1,392 (2.37)   | 0.76 (0.31-1.84) | 0.546  | 0.74 (0.37-1.47) | 0.387  |

High income groups (n= 2,365)

|                                         |                 |                     |                  |       |                  |       |
|-----------------------------------------|-----------------|---------------------|------------------|-------|------------------|-------|
| Normal                                  | 234/473 (49.47) | 1,019/1,892 (53.86) | 1                |       | 1                |       |
| Dyslipidemia without Hydrophilic statin | 200/473 (42.28) | 754/1,892 (39.85)   | 1.16 (0.94-1.43) | 0.18  | 1.15 (0.96-1.38) | 0.121 |
| Dyslipidemia with < 365 days            | 24/473 (5.07)   | 69/1,892 (3.65)     | 1.52 (0.93-2.46) | 0.094 | 1.49 (0.98-2.25) | 0.059 |
| Dyslipidemia with ≥ 365 days            | 15/473 (3.17)   | 50/1,892 (2.64)     | 1.31 (0.72-2.37) | 0.378 | 1.43 (0.87-2.35) | 0.161 |

Urban residents (n= 1,950)

|                                         |                 |                   |                  |       |                  |       |
|-----------------------------------------|-----------------|-------------------|------------------|-------|------------------|-------|
| Normal                                  | 197/390 (50.51) | 857/1,560 (54.94) | 1                |       | 1                |       |
| Dyslipidemia without Hydrophilic statin | 163/390 (41.79) | 600/1,560 (38.46) | 1.18 (0.94-1.49) | 0.159 | 1.17 (0.95-1.43) | 0.132 |

|                                         |                 |                     |                  |         |                  |         |
|-----------------------------------------|-----------------|---------------------|------------------|---------|------------------|---------|
| Dyslipidemia with < 365 days            | 20/390 (5.13)   | 58/1,560 (3.72)     | 1.50 (0.88-2.55) | 0.134   | 1.45 (0.92-2.27) | 0.11    |
| Dyslipidemia with ≥ 365 days            | 10/390 (2.56)   | 45/1,560 (2.88)     | 0.97 (0.48-1.95) | 0.925   | 1.02 (0.58-1.78) | 0.956   |
| Rural residents (n= 2,155)              |                 |                     |                  |         |                  |         |
| Normal                                  | 238/431 (55.22) | 1,004/1,724 (58.24) | 1                |         | 1                |         |
| Dyslipidemia without Hydrophilic statin | 159/431 (36.89) | 631/1,724 (36.6)    | 1.06 (0.85-1.33) | 0.593   | 1.06 (0.87-1.28) | 0.576   |
| Dyslipidemia with < 365 days            | 23/431 (5.34)   | 51/1,724 (2.96)     | 1.90 (1.14-3.17) | 0.014*  | 1.86 (1.19-2.93) | 0.007*  |
| Dyslipidemia with ≥ 365 days            | 11/431 (2.55)   | 38/1,724 (2.2)      | 1.22 (0.62-2.42) | 0.568   | 1.29 (0.73-2.29) | 0.376   |
| CCI scores = 0 (n= 2,903)               |                 |                     |                  |         |                  |         |
| Normal                                  | 269/460 (58.48) | 1,470/2,443 (60.17) | 1                |         | 1                |         |
| Dyslipidemia without Hydrophilic statin | 162/460 (35.22) | 847/2,443 (34.67)   | 1.05 (0.85-1.29) | 0.683   | 1.04 (0.88-1.24) | 0.637   |
| Dyslipidemia with < 365 days            | 16/460 (3.48)   | 73/2,443 (2.99)     | 1.20 (0.69-2.09) | 0.525   | 1.24 (0.81-1.90) | 0.33    |
| Dyslipidemia with ≥ 365 days            | 13/460 (2.83)   | 53/2,443 (2.17)     | 1.34 (0.72-2.49) | 0.354   | 1.37 (0.84-2.25) | 0.205   |
| CCI scores = 1 (n= 550)                 |                 |                     |                  |         |                  |         |
| Normal                                  | 50/113 (44.25)  | 202/437 (46.22)     | 1                |         | 1                |         |
| Dyslipidemia without Hydrophilic statin | 48/113 (42.48)  | 205/437 (46.91)     | 0.95 (0.61-1.47) | 0.805   | 1.02 (0.70-1.48) | 0.933   |
| Dyslipidemia with < 365 days            | 14/113 (12.39)  | 11/437 (2.52)       | 5.14 (2.20-12.0) | <0.001* | 6.20 (2.54-15.1) | <0.001* |
| Dyslipidemia with ≥ 365 days            | 1/113 (0.88)    | 19/437 (4.35)       | 0.21 (0.03-1.63) | 0.136   | 0.27 (0.07-1.09) | 0.066   |
| CCI scores ≥ 2 (n= 652)                 |                 |                     |                  |         |                  |         |
| Normal                                  | 116/248 (46.77) | 189/404 (46.78)     | 1                |         | 1                |         |

|                                         |                 |                     |                  |       |                  |        |
|-----------------------------------------|-----------------|---------------------|------------------|-------|------------------|--------|
| Dyslipidemia without Hydrophilic statin | 112/248 (45.16) | 179/404 (44.31)     | 1.02 (0.73-1.42) | 0.909 | 1.21 (0.86-1.70) | 0.272  |
| Dyslipidemia with < 365 days            | 13/248 (5.24)   | 25/404 (6.19)       | 0.85 (0.42-1.72) | 0.647 | 1.08 (0.53-2.18) | 0.835  |
| Dyslipidemia with ≥ 365 days            | 7/248 (2.82)    | 11/404 (2.72)       | 1.04 (0.39-2.75) | 0.942 | 1.47 (0.56-3.83) | 0.435  |
| Non-diabetes history (n= 3,057)         |                 |                     |                  |       |                  |        |
| Normal                                  | 372/582 (63.92) | 1,639/2,475 (66.22) | 1                |       | 1                |        |
| Dyslipidemia without Hydrophilic statin | 176/582 (30.24) | 735/2,475 (29.7)    | 1.06 (0.86-1.29) | 0.598 | 1.12 (0.95-1.32) | 0.173  |
| Dyslipidemia with < 365 days            | 22/582 (3.78)   | 66/2,475 (2.67)     | 1.47 (0.90-2.41) | 0.128 | 1.53 (1.01-2.32) | 0.045* |
| Dyslipidemia with ≥ 365 days            | 12/582 (2.06)   | 35/2,475 (1.41)     | 1.51 (0.78-2.94) | 0.224 | 1.61 (0.92-2.83) | 0.097  |
| Diabetes history (n= 1,048)             |                 |                     |                  |       |                  |        |
| Normal                                  | 63/239 (26.36)  | 222/809 (27.44)     | 1                |       | 1                |        |
| Dyslipidemia without Hydrophilic statin | 146/239 (61.09) | 496/809 (61.31)     | 1.04 (0.74-1.45) | 0.831 | 1.13 (0.85-1.50) | 0.393  |
| Dyslipidemia with < 365 days            | 21/239 (8.79)   | 43/809 (5.32)       | 1.72 (0.95-3.11) | 0.072 | 1.83 (1.09-3.10) | 0.024* |
| Dyslipidemia with ≥ 365 days            | 9/239 (3.77)    | 48/809 (5.93)       | 0.66 (0.31-1.42) | 0.288 | 0.80 (0.43-1.48) | 0.481  |

---

Abbreviations: CCI, Charlson Comorbidity Index;

\* Significance at  $P < 0.05$

† Adjusted for age, sex, income, region of residence, CCI scores and diabetes history
